# Supplementary material for: Acid-promoted oxidative methylenation of 1,3-dicarbonyl compounds with DMSO: application to the three-component synthesis of Hantzsch-type pyridines
Source: Royal Society of Chemistry journal article supplement (doi:10.1039/c7ra07442e), 2017-01-01
Supplement: c7ra07442e1.pdf [file c7ra07442e1.pdf]

**Acid-Promoted Oxidative Methylenation of 1,3-Dicarbonyl  
Compounds with DMSO: Application to the Three-Component  
Synthesis of Hantzsch-Type Pyridines**

LuLu Xue,<sup>b</sup> Guolin Cheng,<sup>a\*</sup> Ruifeng Zhu,<sup>b</sup> and Xiuling Cui<sup>b\*</sup>

<sup>a</sup>College of Materials Science & Engineering, University of Huaqiao, Xiamen 361021, China

<sup>b</sup>Engineering Research Center of Molecular Medicine, Ministry of Education, Key Laboratory of molecular medicine of Fujian Province, Key Laboratory of Xiamen Marine and Gene Drugs, Institutes of Molecular Medicine and School of Biomedical Sciences, Huaqiao University, Xiamen, 361021, China.

E-mail: glcheng@hqu.edu.cn; cuixl@hqu.edu.cn

## **Context**

|                                                                             |     |
|-----------------------------------------------------------------------------|-----|
| <b>General Information</b>                                                  | S2  |
| <b>Typical Procedure for the Preparation of Polysubstituted Pyridines 4</b> | S2  |
| <b>Typical Procedure for the Preparation of 2</b>                           | S2  |
| <b>Spectroscopic Data for Product</b>                                       | S2  |
| <b>Copies of <sup>1</sup>H NMR, <sup>13</sup>C NMR Spectra</b>              | S9  |
| <b>X-ray Crystallographic Data of 4a</b>                                    | S30 |

### General Information:

Silica gel was purchased from Qing Dao Hai Yang Chemical Industry Co.  $^1\text{H}$  and  $^{13}\text{C}$  NMR spectra were measured on a 400 MHz Bruker spectrometer ( $^1\text{H}$  400 MHz,  $^{13}\text{C}$  100 MHz), using  $\text{CDCl}_3$  as the solvent with tetramethylsilane (TMS) as the internal standard at room temperature. HRMS-ESI spectra were obtained on Agilent 6450 spectrometer.

### Typical Procedure for the Preparation of Polysubstituted Pyridines 4:

1,3-diones **1** (0.5 mmol),  $\text{NH}_4\text{OAc}$  (1.0 mmol), TFA (3.0 mmol), and 2 mL of DMSO were weighed in air and placed in a 5 mL Schlenk tube with magnetic stirring. The mixture was stirred at 120 °C under air atmosphere. After completing reaction, the mixture was diluted with dichloromethane (10 mL) and washed with water ( $3 \times 10$  mL). The organic phase was dried over anhydrous  $\text{Na}_2\text{SO}_4$  and filtered. The solvents were evaporated, and the residue was purified by silica gel column chromatography with EA/petroleum ether (1:50) as the eluent to afford the products **4**.

### Typical Procedure for the Preparation of methylene-bridged bis-1,3-dicarbonyl compounds 2:

1,3-diones **1** (0.5 mmol), AcOH (1.50 mmol) and 2 mL of DMSO were weighed in air and placed in a 5 mL Schlenk tube with magnetic stirring. The mixture was stirred at 120 °C under air atmosphere. After completing reaction, the mixture was diluted with dichloromethane (10 mL) and washed with water ( $3 \times 10$  mL). The organic phase was dried over anhydrous  $\text{Na}_2\text{SO}_4$  and filtered. The solvents were evaporated, and the residue was purified by silica gel column chromatography with EA/petroleum ether (1:50) as the eluent to afford the products **2**.

### Spectroscopic Data for Products

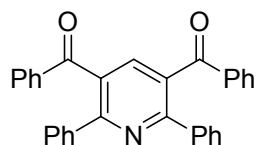

**2,6-diphenylpyridine-3,5-diylbis(phenylmethanone (4a).**

White solid (97% yield).  $^1\text{H}$  NMR (400 MHz,  $\text{CDCl}_3$ )  $\delta$  8.06 (s, 1H), 7.77 – 7.72 (m, 4H), 7.70–7.68 (m, 4H), 7.46 (t,  $J = 7.4$  Hz, 2H), 7.32 (t,  $J = 7.8$  Hz, 4H), 7.29 – 7.25 (m, 6H).  $^{13}\text{C}$  NMR (100 MHz,  $\text{CDCl}_3$ )  $\delta$  196.6, 158.0, 138.8, 138.5, 136.3, 133.5, 131.8, 129.8, 129.5, 129.4, 128.4, 128.3. HRMS (ESI,  $m/z$ ): calcd for  $\text{C}_{31}\text{H}_{21}\text{NO}_2\text{H}^+$ : 440.1645; found: 440.1652.

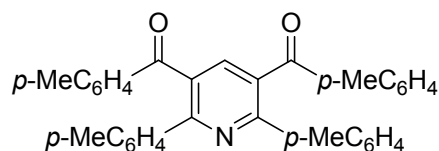

**2,6-di-p-tolylpyridine-3,5-diylbis(p-tolylmethanone (4b)).**

White solid (76% yield).  $^1\text{H}$  NMR (400 MHz,  $\text{CDCl}_3$ )  $\delta$  7.89 (s, 1H), 7.67 (d,  $J = 8.0$  Hz, 4H), 7.60 (d,  $J = 7.9$  Hz, 4H), 7.14 – 7.08 (m, 8H), 2.33 (s, 6H), 2.28 (s, 6H).  $^{13}\text{C}$  NMR (100 MHz,  $\text{CDCl}_3$ )  $\delta$  196.4, 157.5, 144.4, 139.3, 138.2, 135.9, 133.9, 131.4, 130.1, 129.3, 129.2, 129.0, 21.6, 21.2. HRMS (ESI,  $m/z$ ): calcd for  $\text{C}_{35}\text{H}_{29}\text{NO}_2\text{H}^+$ : 496.2271; found: 496.2276.

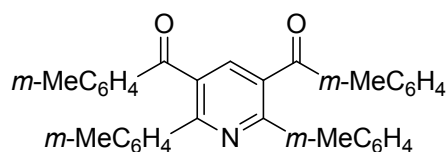

**2,6-di-m-tolylpyridine-3,5-diylbis(m-tolylmethanone (4c))**

White solid (86% yield).  $^1\text{H}$  NMR (400 MHz,  $\text{CDCl}_3$ )  $\delta$  8.03 (s, 1H), 7.54 (s, 6H), 7.43 (d,  $J = 7.2$  Hz, 2H), 7.24 (s, 2H), 7.14 (t,  $J = 7.5$  Hz, 4H), 7.06 (d,  $J = 7.1$  Hz, 2H), 2.28 (s, 12H).  $^{13}\text{C}$  NMR (100 MHz,  $\text{CDCl}_3$ )  $\delta$  196.7, 158.1, 138.6, 138.5, 138.1, 137.9, 136.3, 134.1, 131.8, 130.2, 130.1, 130.0, 128.2, 128.1, 127.0, 126.5, 21.2, 21.0. HRMS (ESI,  $m/z$ ): calcd for  $\text{C}_{35}\text{H}_{29}\text{NO}_2\text{H}^+$ : 496.2271; found: 496.2277.

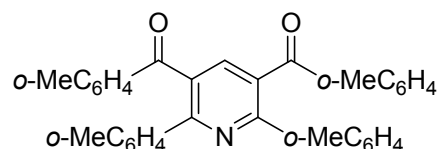

**2,6-di-o-tolylpyridine-3,5-diylbis(o-tolylmethanone (4d))**

White solid (55% yield).  $^1\text{H}$  NMR (400 MHz,  $\text{CDCl}_3$ )  $\delta$  8.22 (s, 1H), 7.25 (d,  $J = 6.8$  Hz, 4H), 7.14 – 6.98 (m, 12H), 2.36 (s, 6H), 2.22 (s, 6H).  $^{13}\text{C}$  NMR (100 MHz,  $\text{CDCl}_3$ )  $\delta$  197.9, 159.7, 138.9, 138.4, 138.2, 137.0, 135.7, 134.6, 131.7, 131.5, 130.2, 130.0,

129.3, 128.6, 125.2, 124.8, 20.5, 19.9. HRMS (ESI,  $m/z$ ): calcd for  $C_{35}H_{29}NO_2H^+$ :496.2271; found: 496.2279.

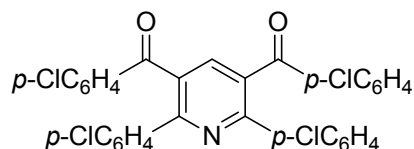

**2,6-bis(4-chlorophenyl)pyridine-3,5-diylbis((4-chlorophenyl)methanone) (4e)**

White solid (86% yield).  $^1H$  NMR (400 MHz,  $CDCl_3$ )  $\delta$  8.02 (s, 1H), 7.65 (d,  $J = 8.0$  Hz, 4H), 7.60 (d,  $J = 7.9$  Hz, 4H), 7.30 (dd,  $J = 12.1, 8.4$  Hz, 8H).  $^{13}C$  NMR (100 MHz,  $CDCl_3$ )  $\delta$  194.9, 156.7, 140.5, 139.0, 136.5, 136.2, 134.3, 131.6, 131.1, 130.6, 129.0, 128.8. HRMS (ESI,  $m/z$ ): calcd for  $C_{31}H_{17}Cl_4NO_2H^+$ :576.0086; found: 576.0093.

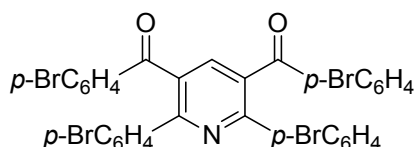

**2,6-bis(4-bromophenyl)pyridine-3,5-diylbis((4-bromophenyl)methanone) (4f)**

White solid (83% yield).  $^1H$  NMR (400 MHz,  $CDCl_3$ )  $\delta$  8.00 (s, 1H), 7.58 (d,  $J = 8.4$  Hz, 4H), 7.51 (dd,  $J = 11.9, 8.5$  Hz, 8H), 7.45 (d,  $J = 8.5$  Hz, 4H).  $^{13}C$  NMR (100 MHz,  $CDCl_3$ )  $\delta$  195.1, 156.8, 138.9, 136.9, 134.7, 132.1, 131.8, 131.5, 131.1, 130.9, 129.4, 124.6. HRMS (ESI,  $m/z$ ): calcd for  $C_{31}H_{17}Br_4NO_2H^+$ :751.8066; found: 751.8073.

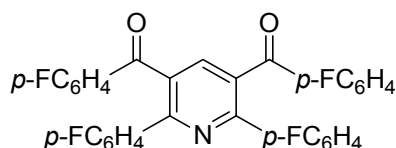

**2,6-bis(4-fluorophenyl)pyridine-3,5-diylbis((4-fluorophenyl)methanone) (4g)**

White solid (91% yield).  $^1H$  NMR (400 MHz,  $CDCl_3$ )  $\delta$  8.05 (s, 1H), 7.74 (dd,  $J = 8.7, 5.4$  Hz, 4H), 7.69 – 7.62 (m, 4H), 7.02-6.97 (m, 8H).  $^{13}C$  NMR (100 MHz,  $CDCl_3$ )  $\delta$  194.8, 166.0 (d,  $J = 238.5$  Hz), 163.5 (d,  $J = 232.2$  Hz), 156.7, 139.0, 134.4 (d,  $J = 3.2$  Hz), 132.5 (d,  $J = 2.7$  Hz), 132.4 (d,  $J = 9.6$  Hz), 131.5, 131.4 (d,  $J = 8.6$  Hz), 115.8 (d,  $J = 22.3$  Hz), 115.6 (d,  $J = 21.9$  Hz).  $^{19}F$  NMR (376 MHz,  $CDCl_3$ )  $\delta$  -102.9, -110.7. HRMS (ESI,  $m/z$ ): calcd for  $C_{31}H_{17}F_4NO_2H^+$ :512.1268; found: 512.1274.

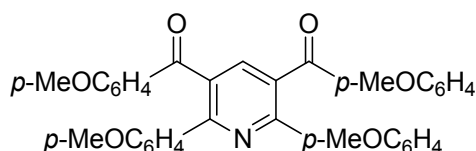

**2,6-bis(4-methoxyphenyl)pyridine-3,5-diylbis((4-methoxyphenyl)methanone (4h)**

White solid (37% yield). <sup>1</sup>H NMR (400 MHz, CDCl<sub>3</sub>) δ 7.89 (s, 1H), 7.74 (d, *J* = 8.8 Hz, 4H), 7.68 (d, *J* = 8.8 Hz, 4H), 6.81 (dd, *J* = 8.7, 6.6 Hz, 8H). <sup>13</sup>C NMR (101 MHz, CDCl<sub>3</sub>) δ 195.6, 163.7, 160.4, 156.6, 138.4, 132.3, 131.2, 130.9, 130.8, 129.3, 113.7, 113.7, 55.4, 55.2 HRMS (ESI, *m/z*): calcd for C<sub>35</sub>H<sub>29</sub>NO<sub>6</sub>H<sup>+</sup>:560.2068; found:560.2074.

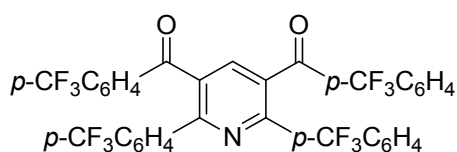

**2,6-bis(4-(trifluoromethyl)phenyl)pyridine-3,5-diylbis((4-(trifluoromethyl)phenyl)methanone (4i)**

White solid (94% yield). <sup>1</sup>H NMR (400 MHz, CDCl<sub>3</sub>) δ 8.19 (s, 1H), 7.85 (d, *J* = 8.0 Hz, 4H), 7.77 (d, *J* = 7.9 Hz, 4H), 7.60 (dd, *J* = 17.0, 8.0 Hz, 8H). <sup>13</sup>C NMR (100 MHz, CDCl<sub>3</sub>) δ 194.6, 157.37, 141.20, 139.35, 138.58, 135.1 (q, *J* = 32.9 Hz), 132.2, 131.7 (q, *J* = 32.8 Hz), 130.0, 129.8, 125.7 (q, *J* = 3.6 Hz), 125.5 (q, *J* = 3.7 Hz), 123.6 (q, *J* = 272.4 Hz), 123.1 (q, *J* = 273.0 Hz). <sup>19</sup>F NMR (376 MHz, CDCl<sub>3</sub>) δ -63.0, -63.4. HRMS (ESI, *m/z*): calcd for C<sub>35</sub>H<sub>17</sub>F<sub>12</sub>NO<sub>2</sub>H<sup>+</sup>:712.1140; found: 712.1148.

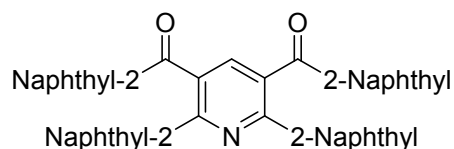

**2,6-di(naphthalen-1-yl)pyridine-3,5-diylbis(naphthalen-1-ylmethanone (4f)**

White solid (79% yield). <sup>1</sup>H NMR (400 MHz, CDCl<sub>3</sub>) δ 8.29 (s, 2H), 8.26 (s, 2H), 8.22 (s, 1H), 7.99 – 7.92 (m, 4H), 7.80 (dd, *J* = 14.2, 6.2 Hz, 5H), 7.78 – 7.69 (m, 7H), 7.52 (dd, *J* = 11.0, 4.0 Hz, 2H), 7.49 – 7.44 (m, 3H), 7.43 – 7.39 (m, 3H). <sup>13</sup>C NMR (100 MHz, CDCl<sub>3</sub>) δ 196.7, 157.9, 138.8, 136.0, 135.6, 133.7, 133.5, 132.9, 132.6, 132.2, 132.1, 129.7, 129.6, 128.8, 128.6, 128.3, 127.7, 127.5, 126.9, 126.8, 126.3, 126.3, 124.5. HRMS (ESI, *m/z*): calcd for C<sub>47</sub>H<sub>29</sub>NO<sub>2</sub>H<sup>+</sup>:640.2271; found: 640.2271.

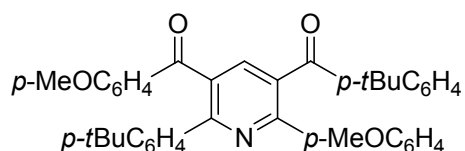

**5-(4-(tert-butyl)benzoyl)-2-(4-(tert-butyl)phenyl)-6-(4-methoxyphenyl)pyridin-3-yl(4-methoxyphenyl)methanone (4k)**

White solid (53% yield).  $^1\text{H}$  NMR (400 MHz,  $\text{CDCl}_3$ )  $\delta$  7.88 (s, 1H), 7.73 (t,  $J = 8.8$  Hz, 4H), 7.65 (dd,  $J = 12.2, 8.5$  Hz, 4H), 7.37 (d,  $J = 8.3$  Hz, 2H), 7.30 (d,  $J = 8.3$  Hz, 2H), 6.86 – 6.77 (m, 4H), 3.80 (s, 3H), 3.76 (s, 3H), 1.29 (s, 11H), 1.26 (s, 7H).  $^{13}\text{C}$  NMR (100 MHz,  $\text{CDCl}_3$ )  $\delta$  196.5, 195.3, 163.7, 160.5, 157.4, 157.3, 157.1, 152.3, 138.2, 135.8, 133.9, 133.8, 132.4, 131.2, 131.1, 131.0, 130.9, 130.0, 129.6, 129.1, 125.4, 125.2, 113.8, 113.7, 55.4, 55.2, 35.1, 34.5, 31.1, 30.0. HRMS (ESI,  $m/z$ ): calcd for  $\text{C}_{41}\text{H}_{41}\text{NO}_4\text{H}^+$ :612.3108; found: 612.3115.

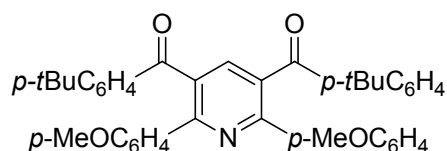

**2,6-bis(4-methoxyphenyl)pyridine-3,5-diylbis((4-(tert-butyl)phenyl)methanone (4k'))**

White solid (39% yield).  $^1\text{H}$  NMR (400 MHz,  $\text{CDCl}_3$ )  $\delta$  7.90 (s, 1H), 7.75 (d,  $J = 8.8$  Hz, 4H), 7.64 (d,  $J = 8.4$  Hz, 4H), 7.30 (d,  $J = 8.4$  Hz, 4H), 6.81 (d,  $J = 8.9$  Hz, 4H), 3.80 (s, 6H), 1.25 (s, 18H).  $^{13}\text{C}$  NMR (100 MHz,  $\text{CDCl}_3$ )  $\delta$  195.3, 163.7, 157.4, 152.2, 138.03, 135.7, 132.4, 131.4, 129.5, 129.1, 125.2, 113.6, 55.4, 34.5, 31.0. HRMS (ESI,  $m/z$ ): calcd for  $\text{C}_{41}\text{H}_{41}\text{NO}_4\text{H}^+$ :612.3108; found: 612.3115.

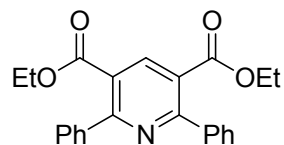

**diethyl 2,6-diphenylpyridine-3,5-dicarboxylate (4l)**

White solid (33% yield).  $^1\text{H}$  NMR (400 MHz,  $\text{CDCl}_3$ )  $\delta$  8.55 (s, 1H), 7.63 (dd,  $J = 6.6, 3.0$  Hz, 5H), 7.44 (dd,  $J = 4.2, 2.2$  Hz, 7H), 4.21 (q,  $J = 7.1$  Hz, 5H), 1.10 (t,  $J = 7.1$  Hz, 7H).  $^{13}\text{C}$  NMR (100MHz,  $\text{CDCl}_3$ )  $\delta$  167.4, 159.7, 140.2, 139.3, 129.1, 128.9, 128.0, 124.7, 61.6, 13.6.

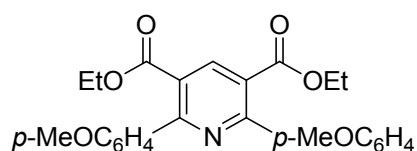

**diethyl 2,6-bis(4-methoxyphenyl)pyridine-3,5-dicarboxylate (*4m*)**

White solid (21% yield).  $^1\text{H}$  NMR (400 MHz,  $\text{CDCl}_3$ )  $\delta$  8.48 (s, 1H), 7.62 (d,  $J = 8.8$  Hz, 4H), 6.96 (d,  $J = 8.8$  Hz, 4H), 4.24 (q,  $J = 7.1$  Hz, 4H), 3.86 (s, 6H), 1.18 (t,  $J = 7.1$  Hz, 6H).  $^{13}\text{C}$  NMR (100 MHz,  $\text{CDCl}_3$ )  $\delta$  167.7, 160.6, 158.9, 140.4, 131.7, 130.5, 123.4, 113.4, 61.5, 55.3, 13.8.

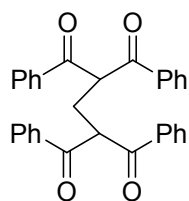

**2,4-dibenzoyl-1,5-diphenylpentane-1,5-dione (*2a*)**

$^1\text{H}$  NMR (400 MHz,  $\text{CDCl}_3$ )  $\delta$  8.14 (d,  $J = 8.0$  Hz, 8H), 7.58 (t,  $J = 7.3$  Hz, 4H), 7.48 (t,  $J = 7.7$  Hz, 8H), 5.74 (t,  $J = 7.0$  Hz, 2H), 2.76 (t,  $J = 7.0$  Hz, 2H).  $^{13}\text{C}$  NMR (100 MHz,  $\text{CDCl}_3$ )  $\delta$  196.5, 135.4, 133.8, 129.0, 128.7, 53.9, 28.9.

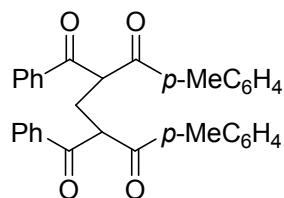

**2,4-dibenzoyl-1,5-di-p-tolylpentane-1,5-dione (*2b*)**

$^1\text{H}$  NMR (400 MHz,  $\text{CDCl}_3$ )  $\delta$  8.17 – 8.09 (m, 4H), 8.05 (dd,  $J = 8.0, 6.5$  Hz, 4H), 7.56 (dd,  $J = 6.7, 1.6$  Hz, 2H), 7.51 – 7.42 (m, 4H), 7.28 (dd,  $J = 8.0, 3.1$  Hz, 4H), 5.71 (t,  $J = 7.0$  Hz, 2H), 2.73 (t,  $J = 7.0$  Hz, 2H), 2.39 (d,  $J = 1.7$  Hz, 6H).  $^{13}\text{C}$  NMR (100 MHz,  $\text{CDCl}_3$ )  $\delta$  196.7, 196.6, 196.2, 196.1, 144.8, 135.4, 135.4, 133.7, 132.9, 132.8, 129.7, 128.9, 128.9, 128.7, 128.7, 53.8, 28.9, 21.6.

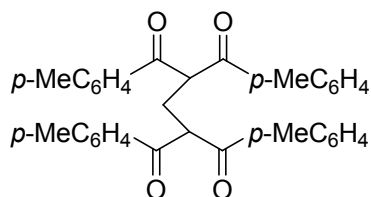

**2,4-bis(4-methylbenzoyl)-1,5-di-p-tolylpentane-1,5-dione (*2c*)**

$^1\text{H}$  NMR (400 MHz,  $\text{CDCl}_3$ )  $\delta$  8.07 – 8.01 (m, 4H), 7.92 (t,  $J = 9.3$  Hz, 4H), 7.42 – 7.32 (m, 4H), 7.31 – 7.24 (m, 4H), 5.69 (t,  $J = 6.7$  Hz, 2H), 2.72 (t,  $J = 6.7$  Hz, 2H), 2.39 (s, 12H).  $^{13}\text{C}$  NMR (100 MHz,  $\text{CDCl}_3$ )  $\delta$  196.9, 196.8, 196.3, 196.2, 144.7, 138.7, 135.5, 135.4, 134.5, 133.0, 132.9, 129.6, 129.2, 128.9, 128.9, 128.9, 128.8, 125.9, 53.9, 28.9, 21.6, 21.3.

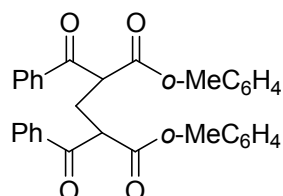

2,4-dibenzoyl-1,5-di-o-tolylpentane-1,5-dione (**2d**).

$^1\text{H}$  NMR (400 MHz,  $\text{CDCl}_3$ )  $\delta$  8.01 – 7.92 (m, 1H), 7.86 – 7.77 (m, 2H), 7.51 – 7.42 (m, 2H), 7.35 (dd,  $J = 15.4, 7.7$  Hz, 4H), 7.27 (dd,  $J = 14.7, 7.3$  Hz, 2H), 7.30 – 7.19 (m, 4H), 5.60 (dd,  $J = 11.7, 6.9$  Hz, 2H), 2.69 (dd,  $J = 13.0, 6.8$  Hz, 2H), 2.36 (d,  $J = 16.3$  Hz, 6H).  $^{13}\text{C}$  NMR (100 MHz,  $\text{CDCl}_3$ )  $\delta$  199.6, 199.4, 196.6, 196.4, 139.4, 136.6, 136.4, 135.7, 135.5, 133.7, 133.7, 132.2, 132.1, 132.0, 128.8, 128.8, 128.7, 128.6, 126.0, 56.1, 56.1, 29.0, 21.2.

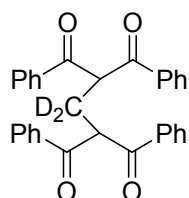

2,4-dibenzoyl-3,3-deutero-1,5-diphenylpentane-1,5-dione (**2a-d<sub>2</sub>**)

$^1\text{H}$  NMR (400 MHz,  $\text{CDCl}_3$ )  $\delta$  8.22 – 8.11 (m, 8H), 7.59 (dd,  $J = 10.5, 4.2$  Hz, 4H), 7.49 (t,  $J = 7.6$  Hz, 8H), 5.74 (s, 2H).  $^{13}\text{C}$  NMR (126 MHz,  $\text{CDCl}_3$ )  $\delta$  196.6, 135.3, 133.8, 129.0, 128.7, 53.7, 28.7 – 28.2 (m).

(5-benzoyl-2-(4-chlorophenyl)-6-phenylpyridin-3-yl)(4-chlorophenyl)methanone (**5**)

$^1\text{H}$  NMR (500 MHz,  $\text{CDCl}_3$ )  $\delta$  8.03 (s, 1H), 7.75 – 7.70 (m, 2H), 7.70 – 7.64 (m, 4H), 7.64 – 7.60 (m, 2H), 7.47 (t,  $J = 7.4$  Hz, 1H), 7.39 – 7.26 (m, 9H);  $^{13}\text{C}$  NMR (126 MHz,  $\text{CDCl}_3$ )  $\delta$  196.4, 195.2, 158.3, 156.5, 140.4, 138.9, 138.3, 136.9, 136.2, 136.0, 134.5, 133.7, 132.2, 131.3, 131.2, 130.7, 129.9, 129.6, 129.5, 129.0, 128.8, 128.5, 128.5; HRMS (ESI,  $m/z$ ): calcd for  $\text{C}_{31}\text{H}_{19}\text{Cl}_2\text{NO}_2\text{H}^+$ : 508.0866; found: 508.0861.



# Copies of $^1\text{H}$ NMR, $^{13}\text{C}$ NMR spectra of products

## $^1\text{H}$ NMR spectrum of product **4a**

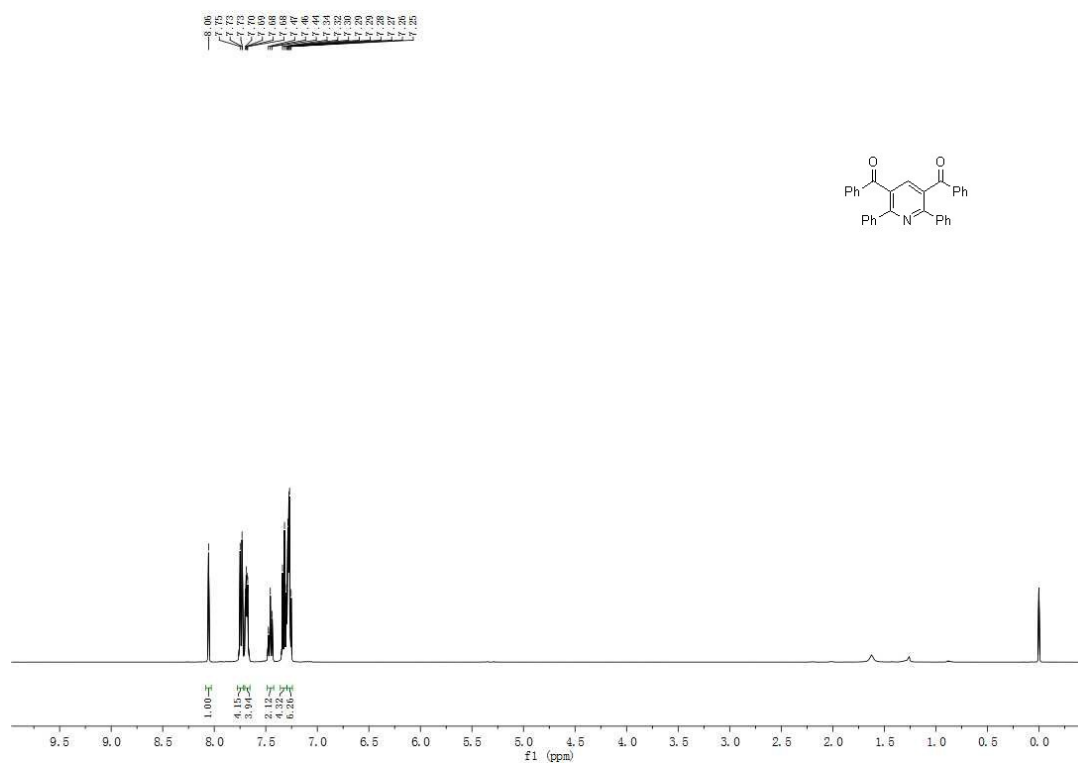

## $^{13}\text{C}$ NMR spectrum of product **4a**

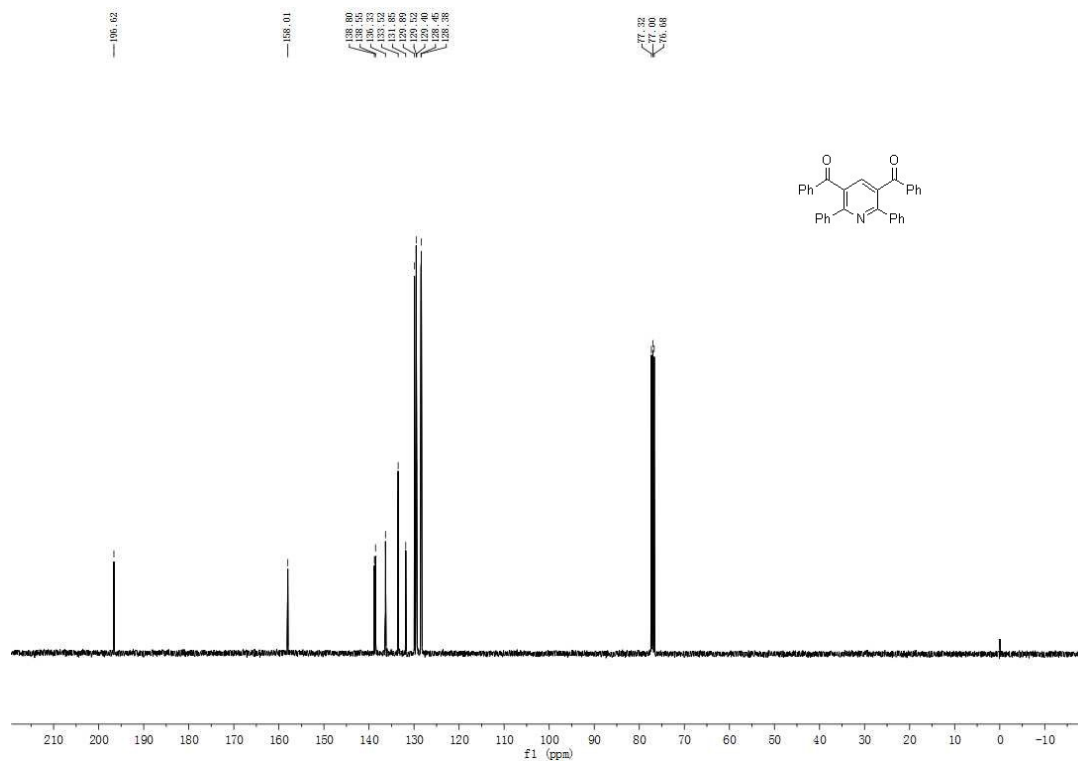

### $^1\text{H}$ NMR spectrum of product **4b**

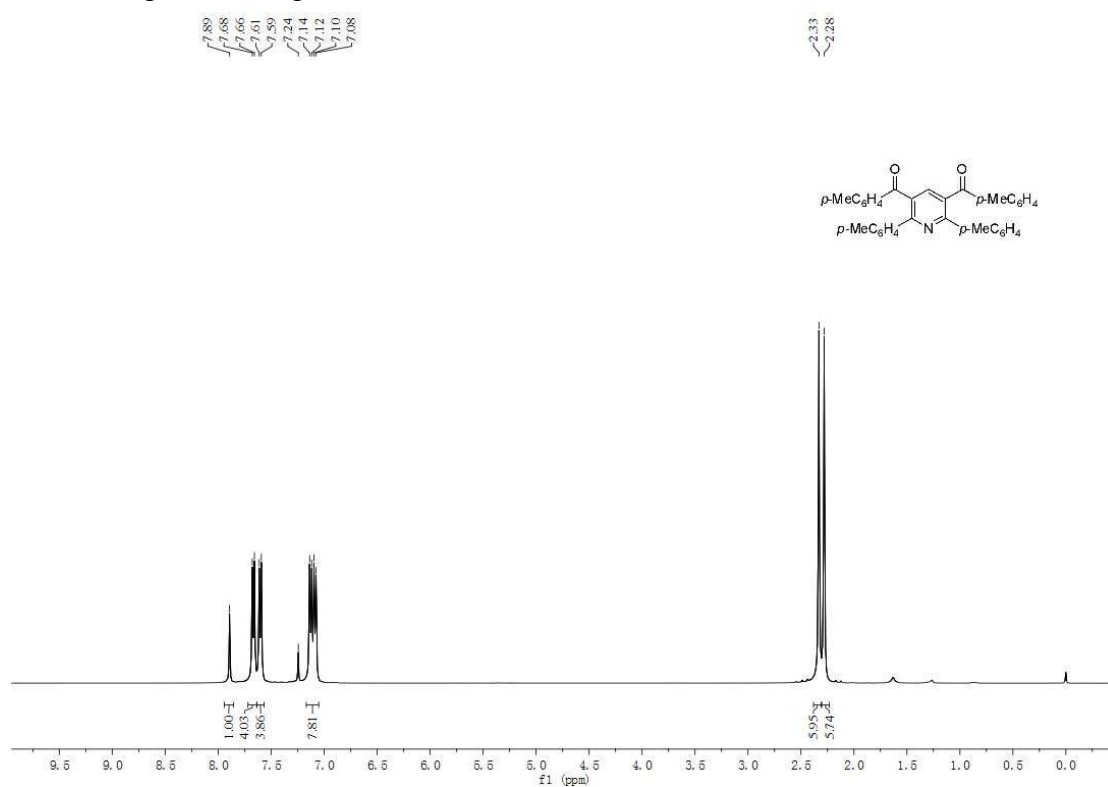

### $^{13}\text{C}$ NMR spectrum of product **4b**

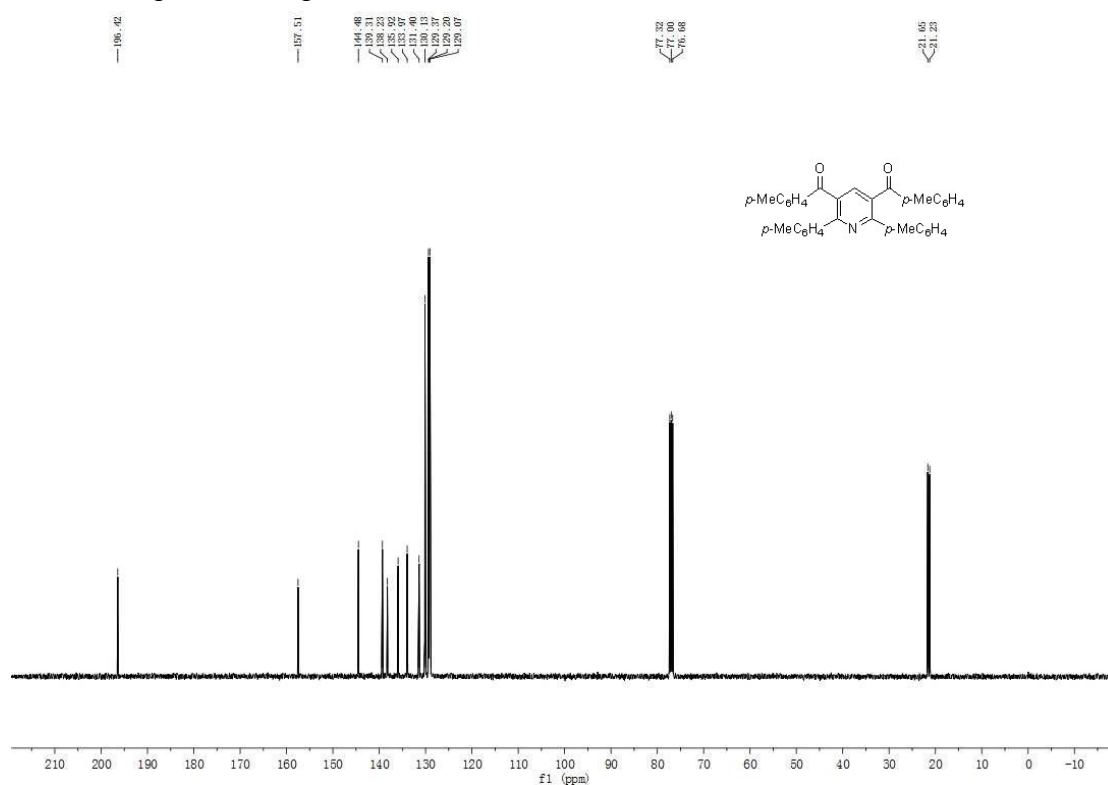

$^1\text{H}$  NMR spectrum of product **4c**

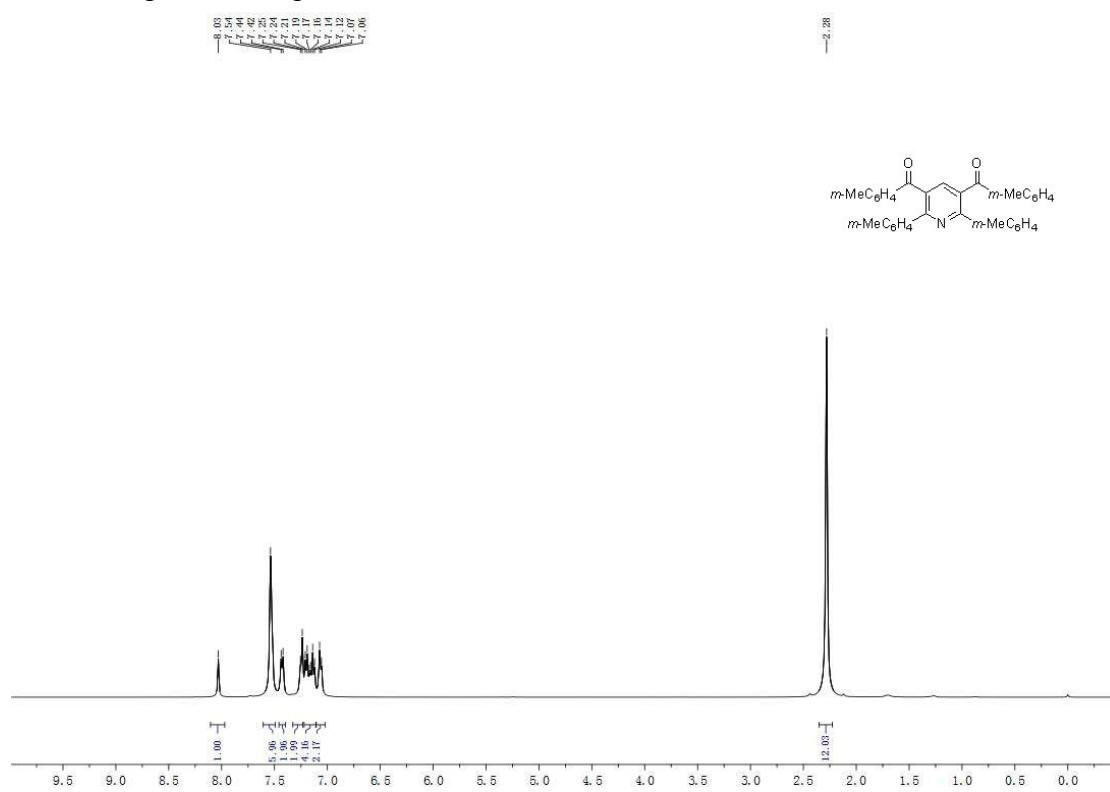

$^{13}\text{C}$  NMR spectrum of product **4c**

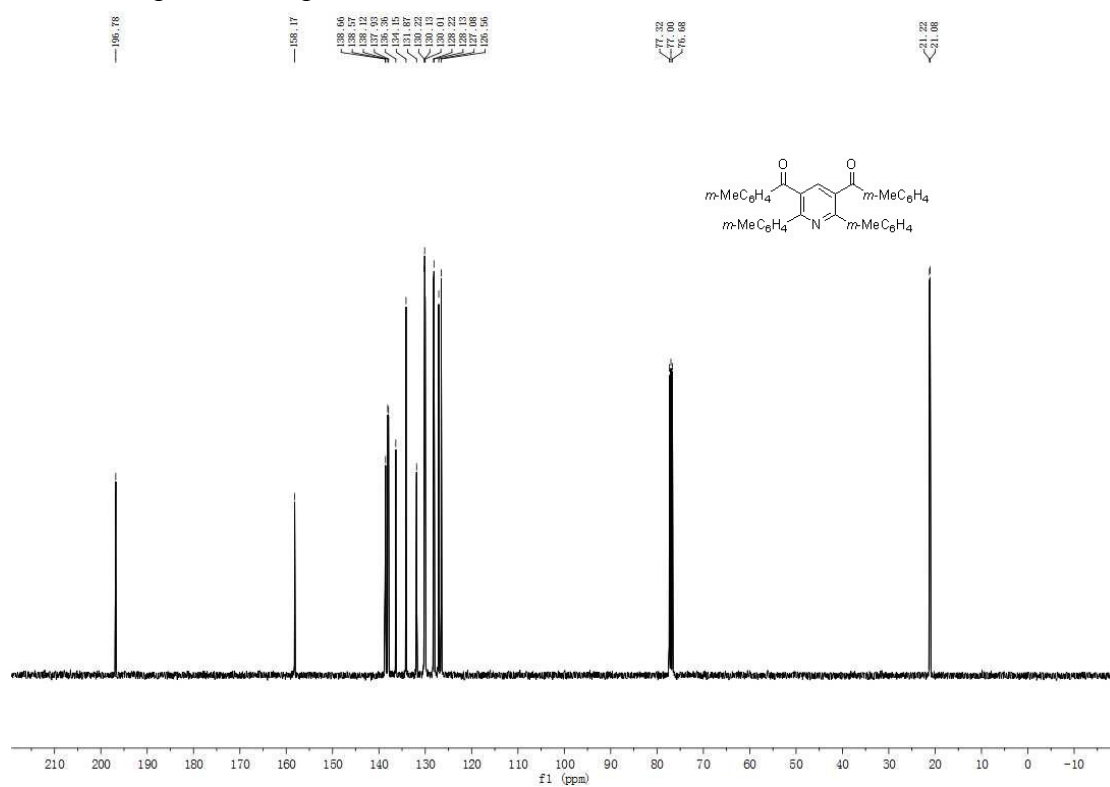

### <sup>1</sup>H NMR spectrum of product **4d**

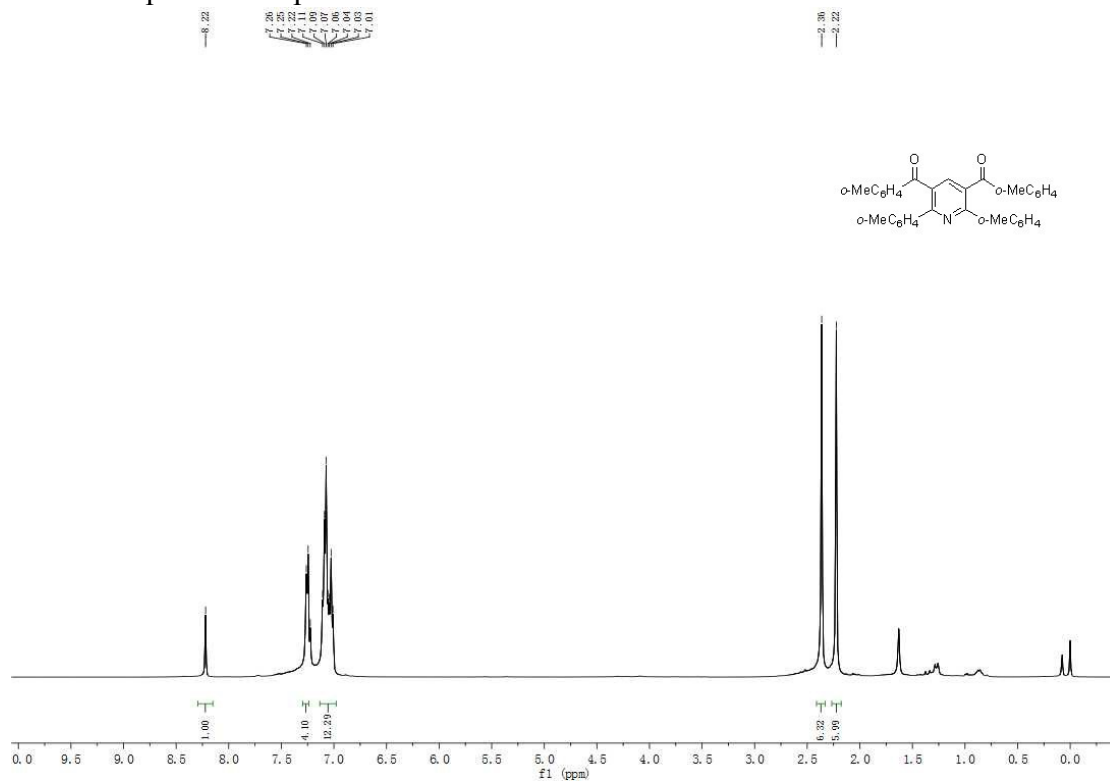

### <sup>13</sup>C NMR spectrum of product **4d**

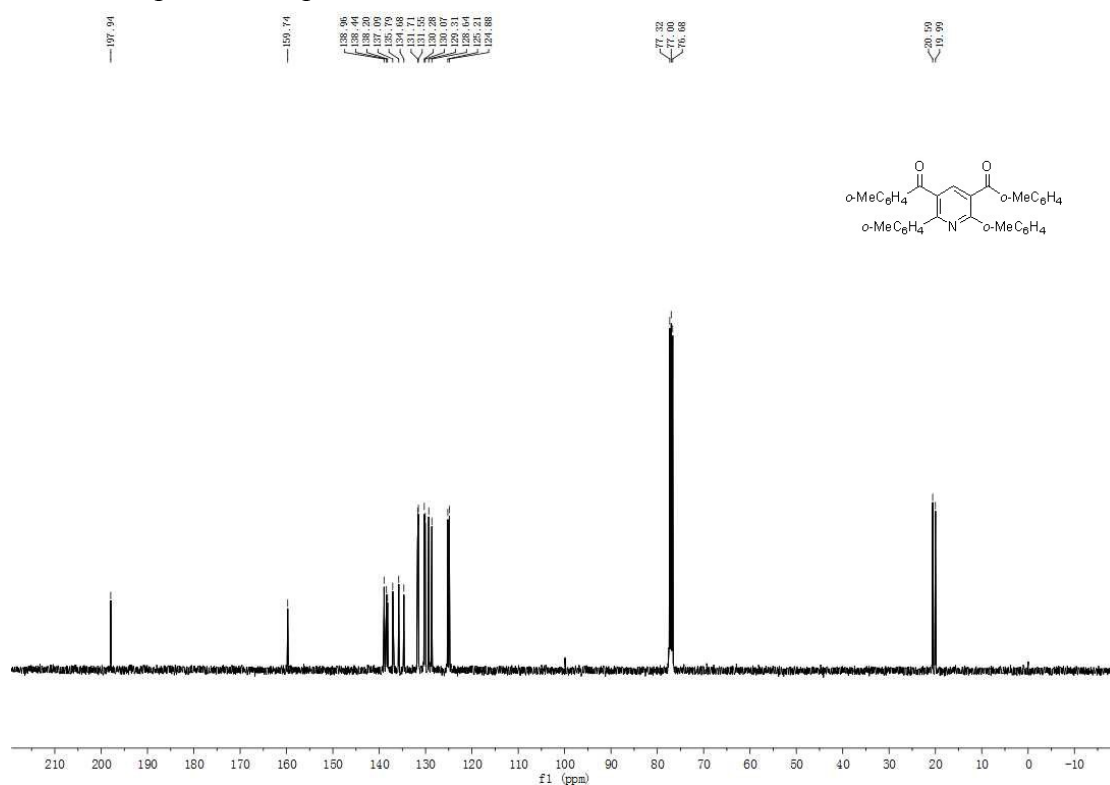

# <sup>1</sup>H NMR spectrum of product 4e

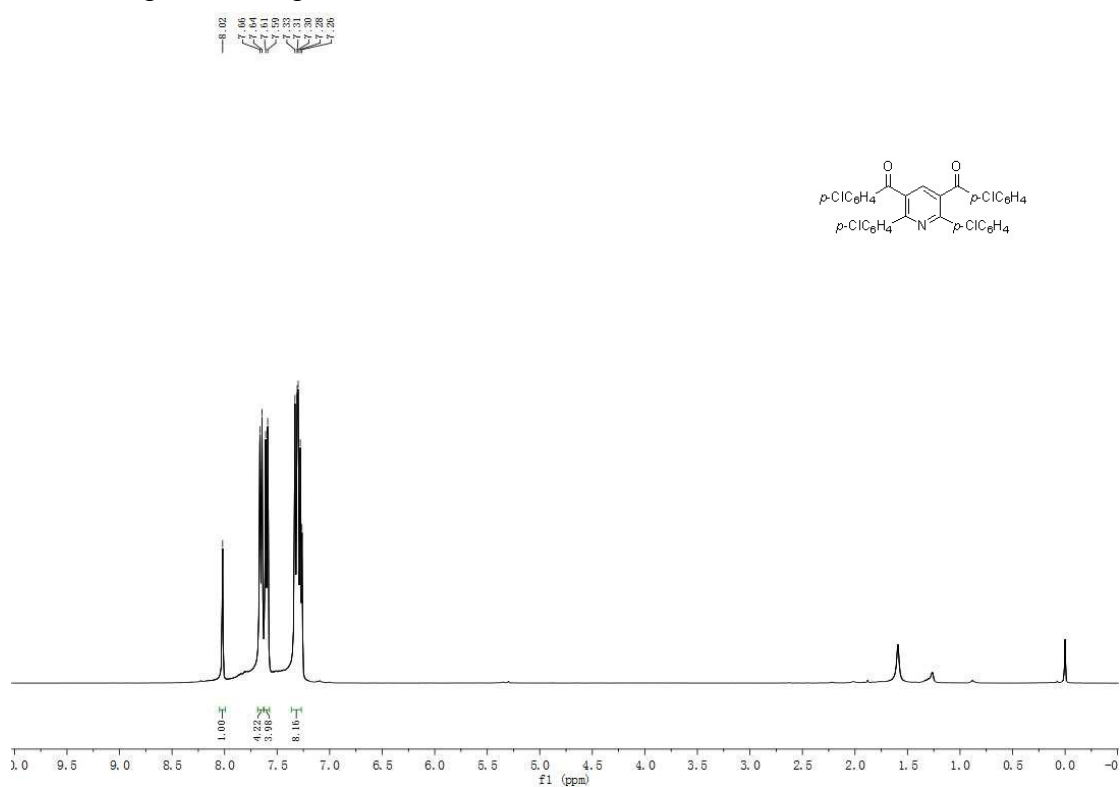

# <sup>13</sup>C NMR spectrum of product 4e

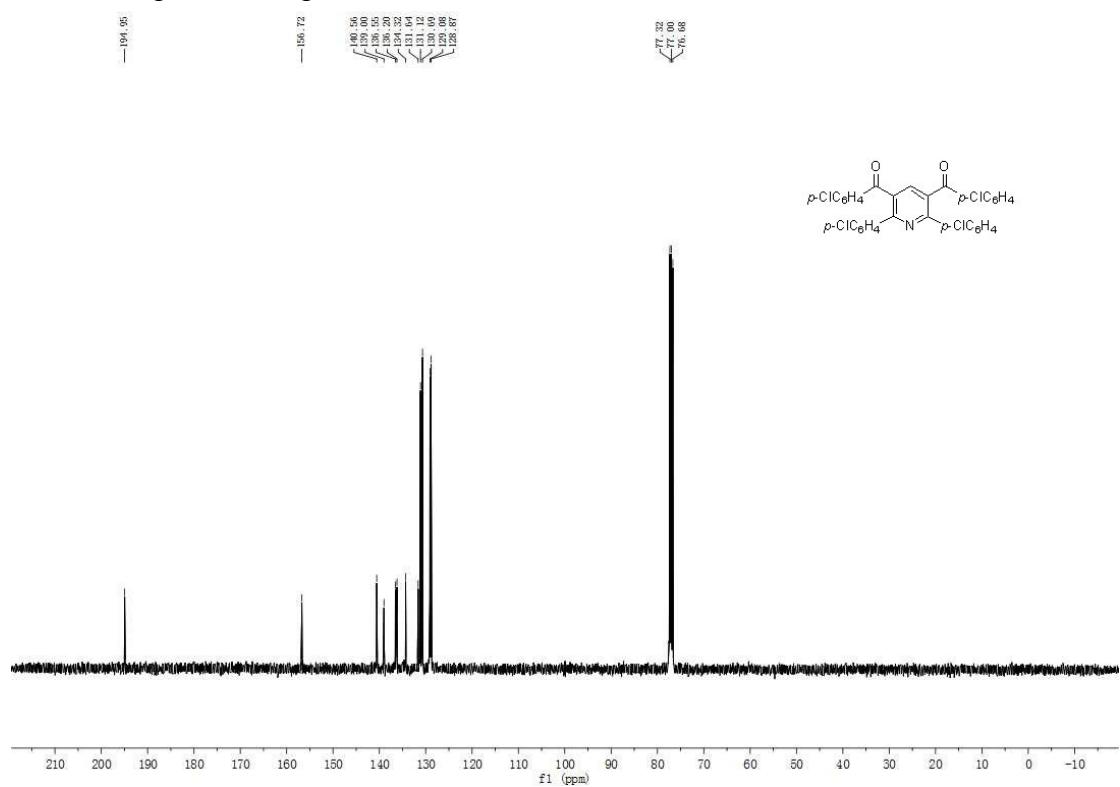

# <sup>1</sup>H NMR spectrum of product 4f

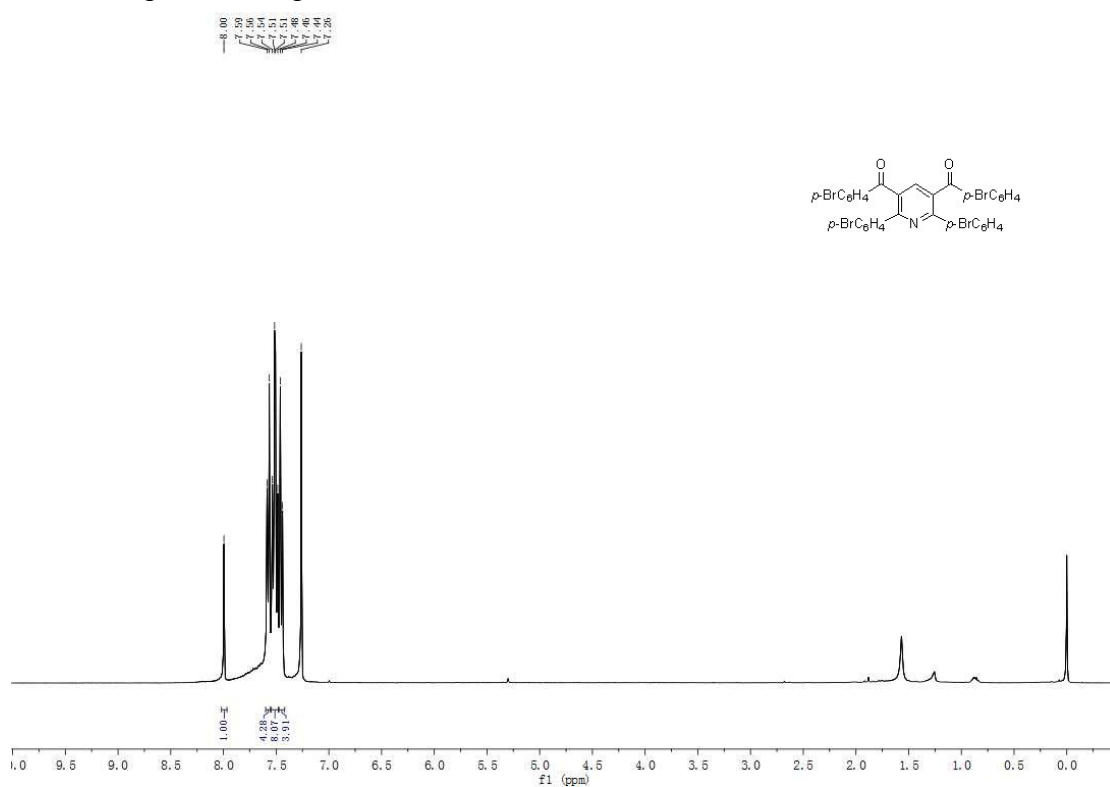

# <sup>13</sup>C NMR spectrum of product 4f

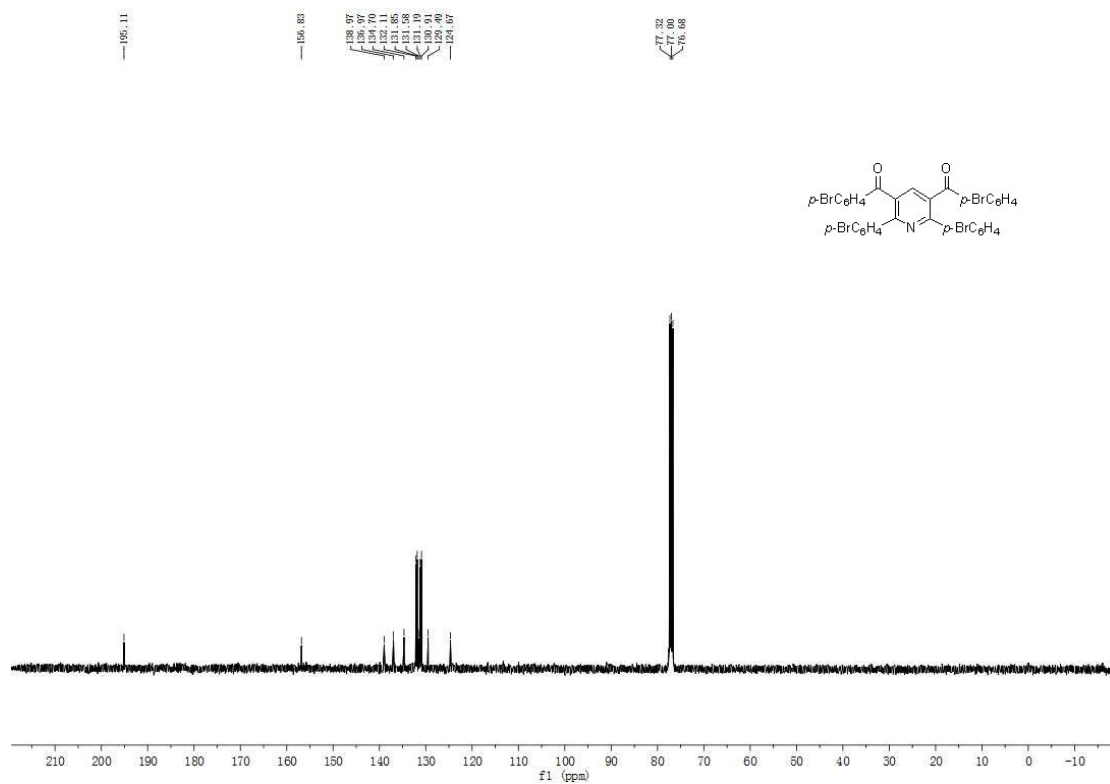

# <sup>1</sup>H NMR spectrum of product 4g

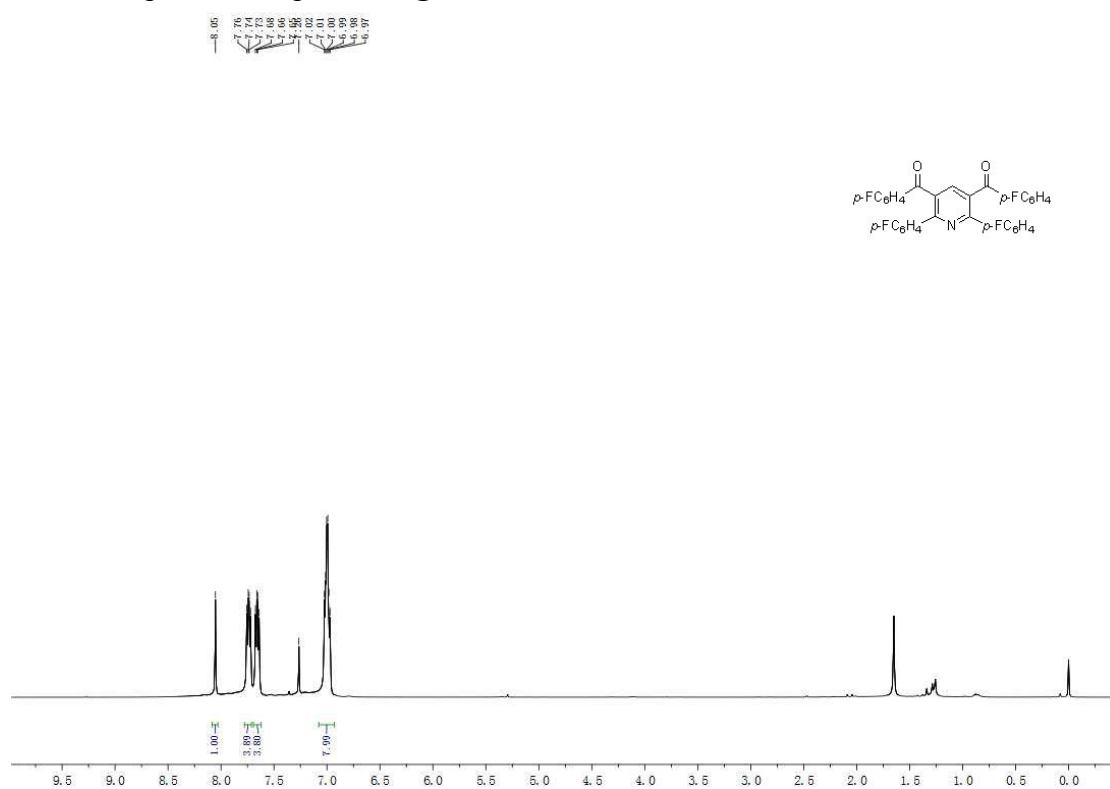

# <sup>13</sup>C NMR spectrum of product 4g

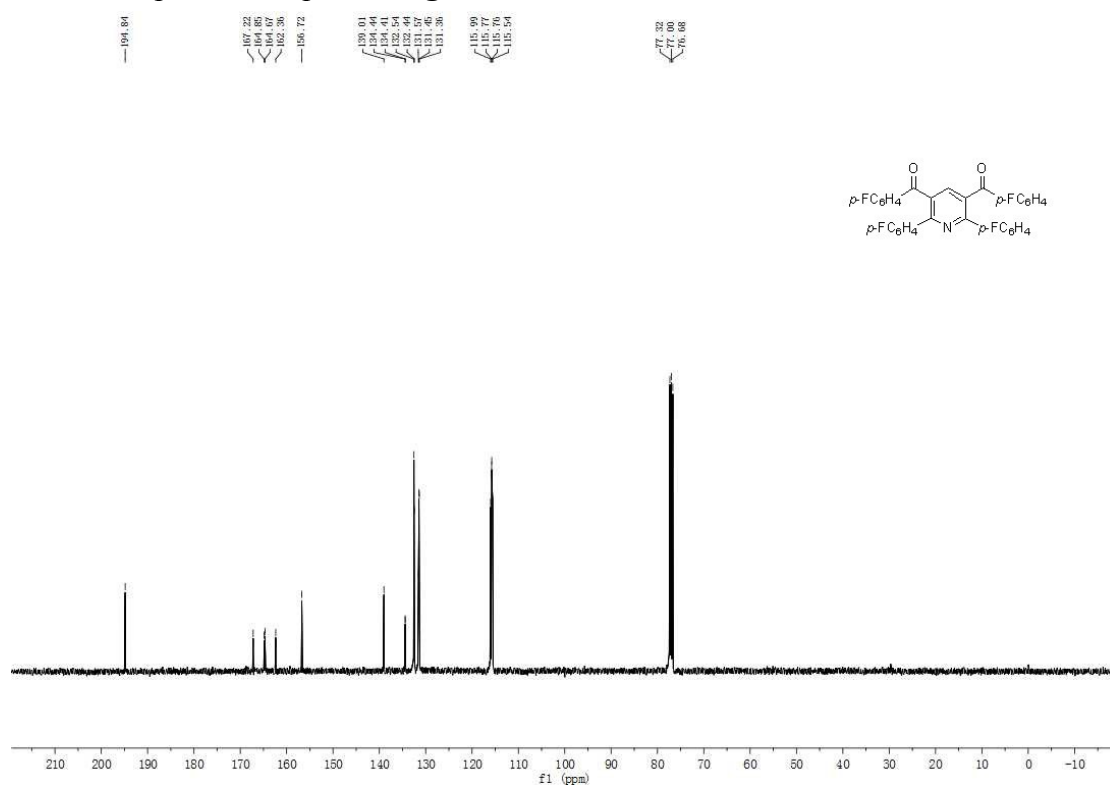

<sup>19</sup>F NMR spectrum of product **4g**

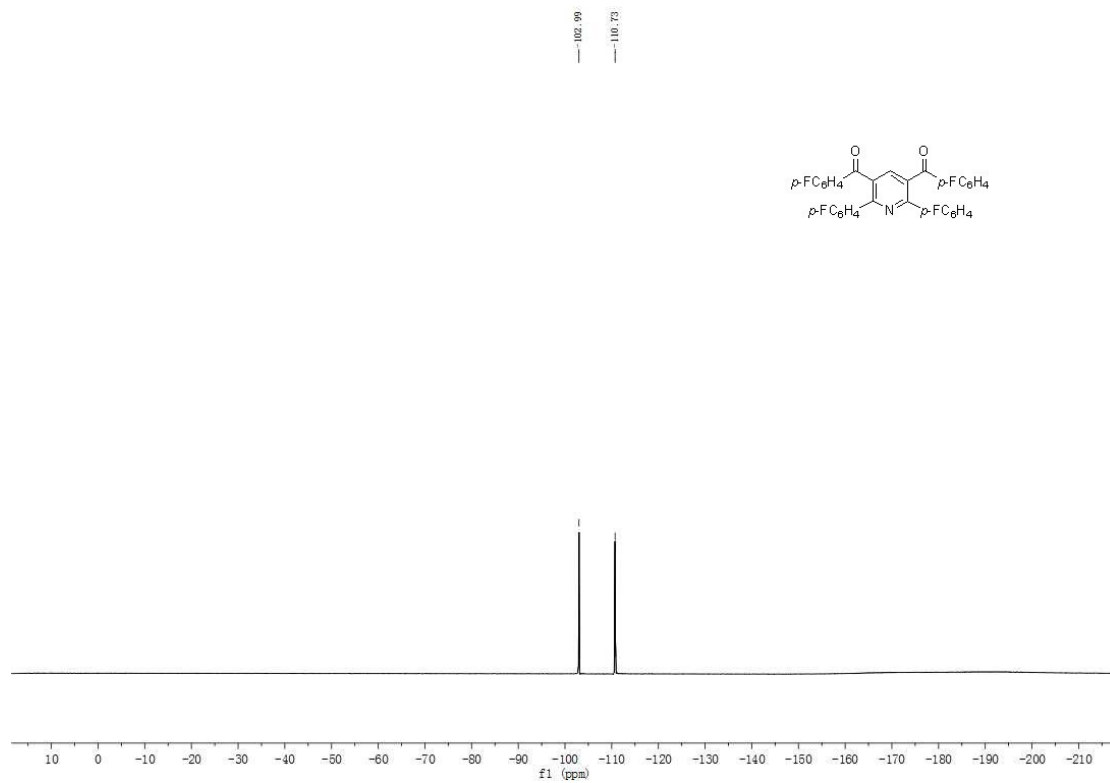

<sup>1</sup>H NMR spectrum of product **4h**

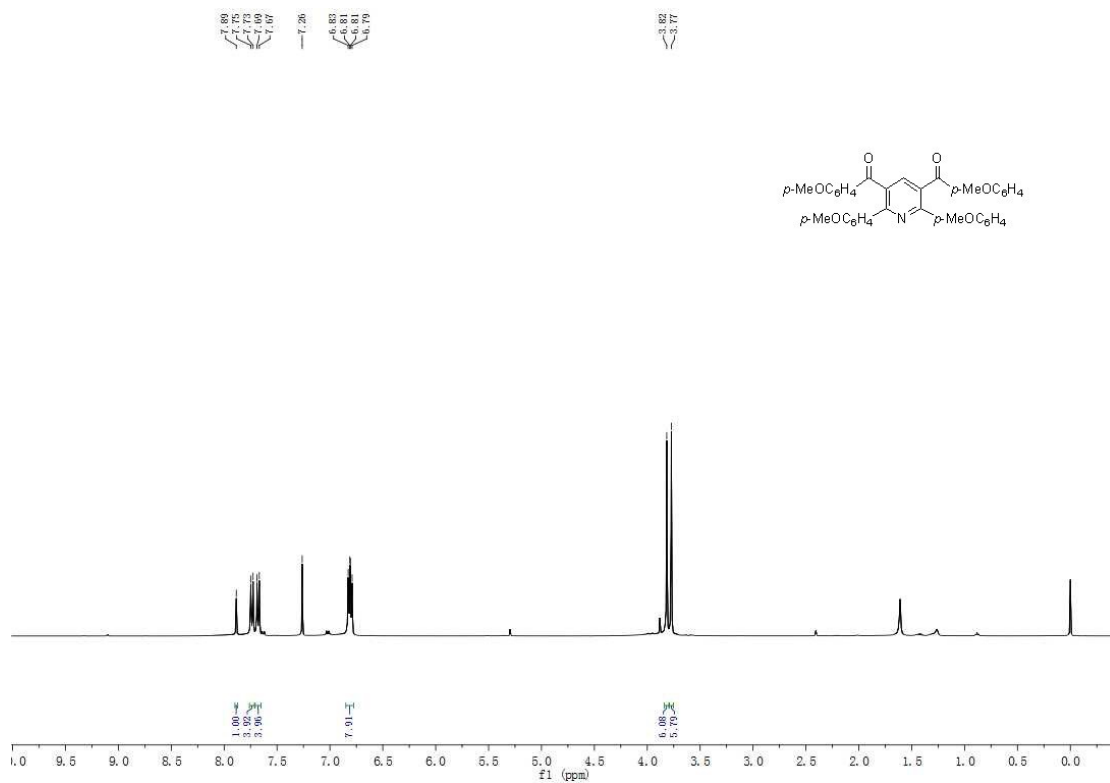



### <sup>13</sup>C NMR spectrum of product **4h**

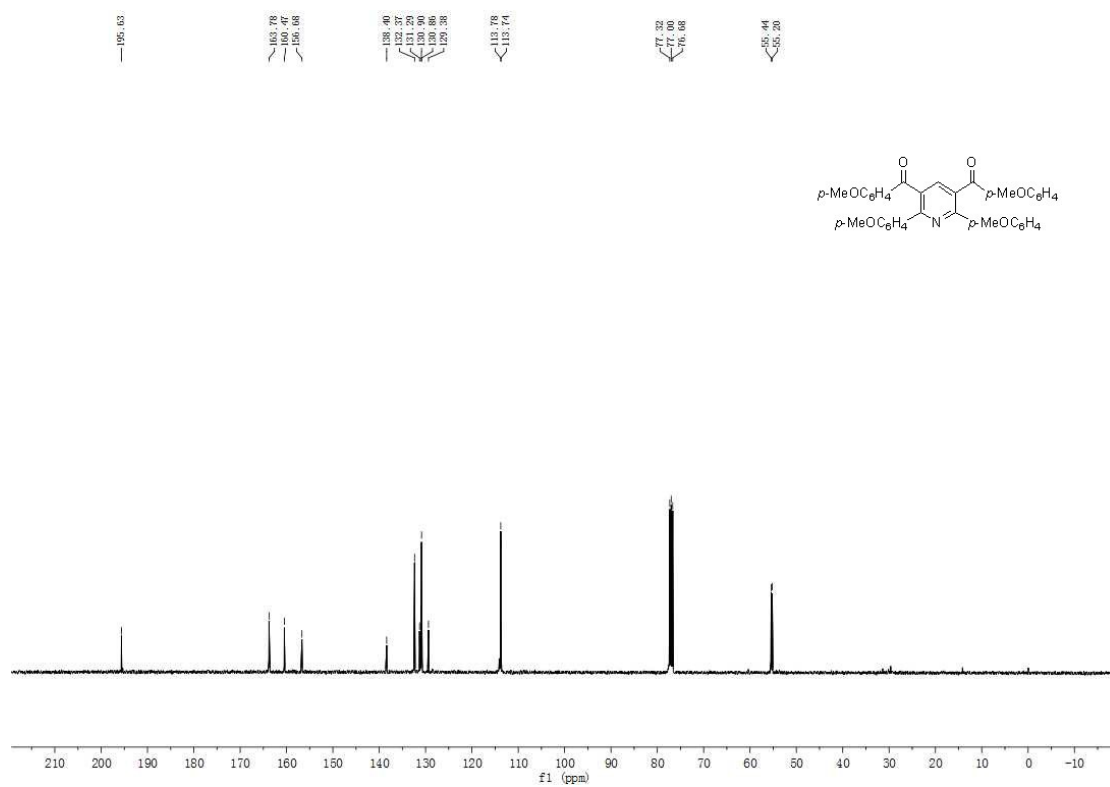

### <sup>1</sup>H NMR spectrum of product **4i**

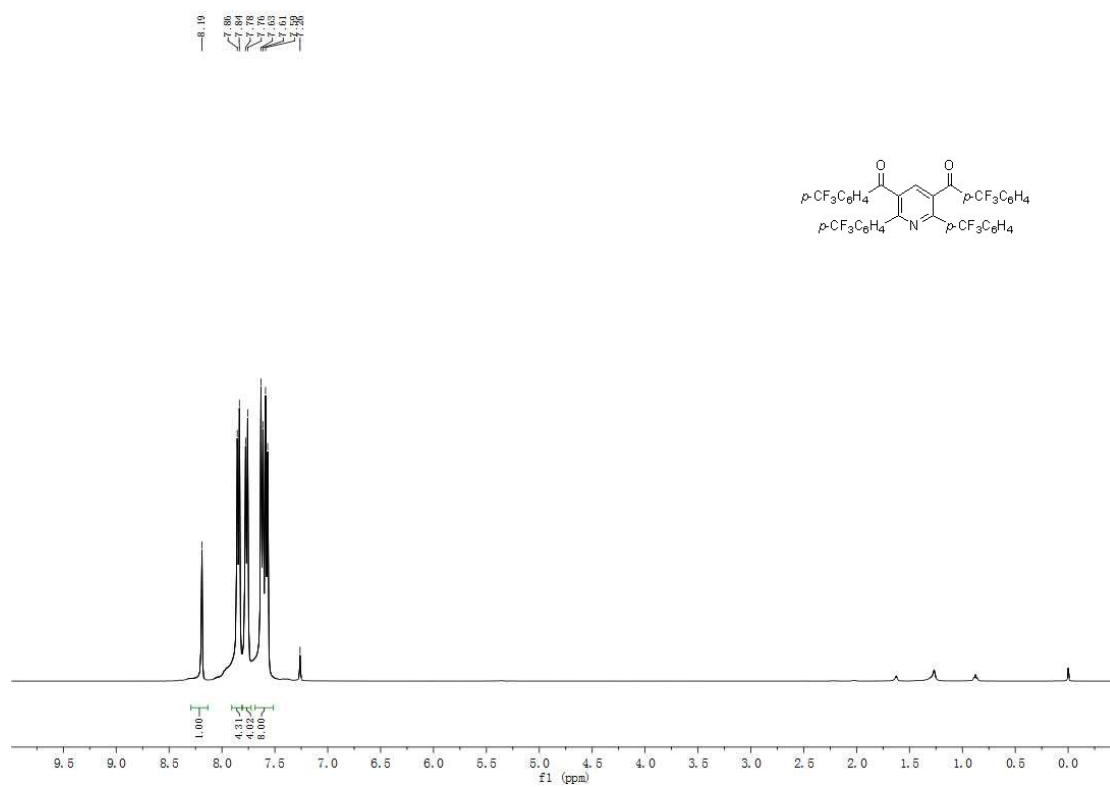

### <sup>13</sup>C NMR spectrum of product **4i**

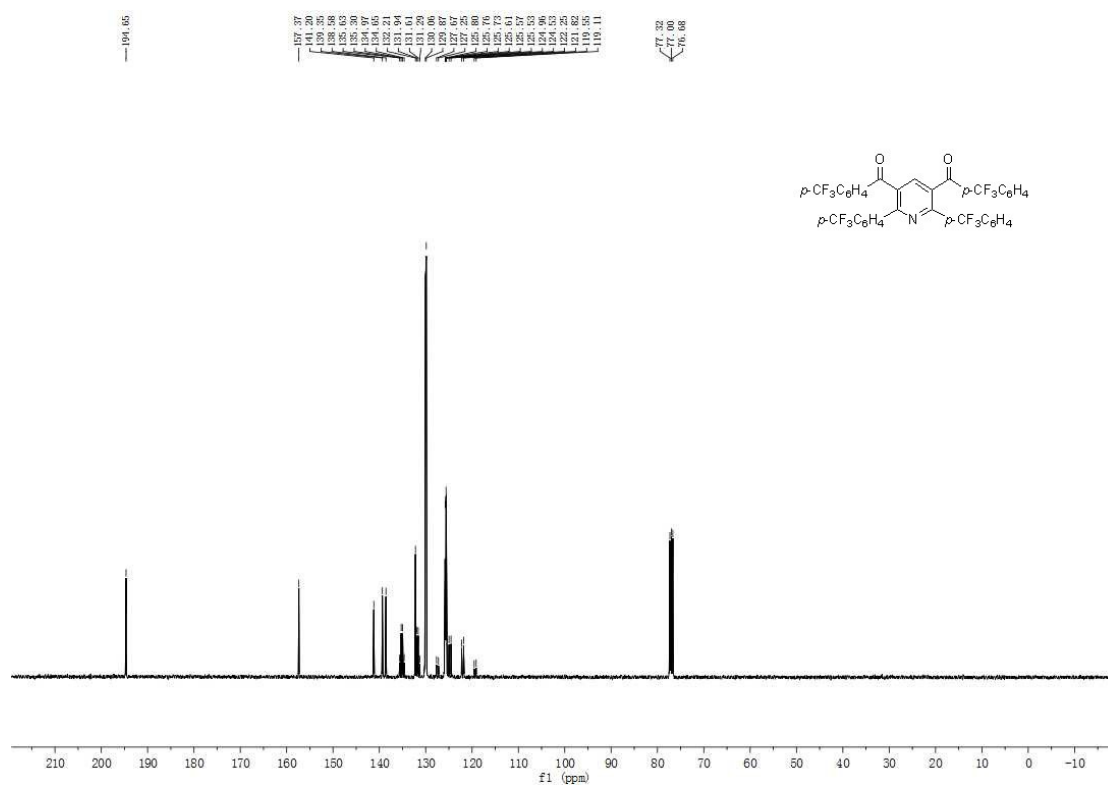

### <sup>19</sup>F NMR spectrum of product **4i**

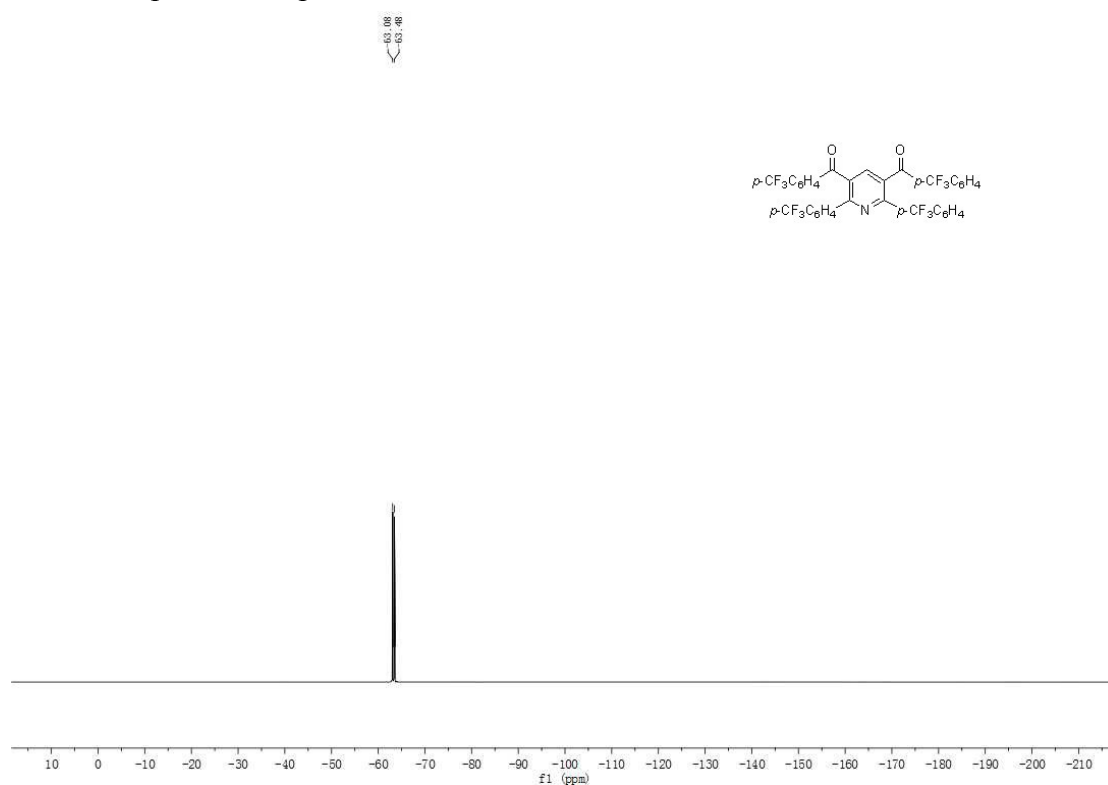

# <sup>1</sup>H NMR spectrum of product 4j

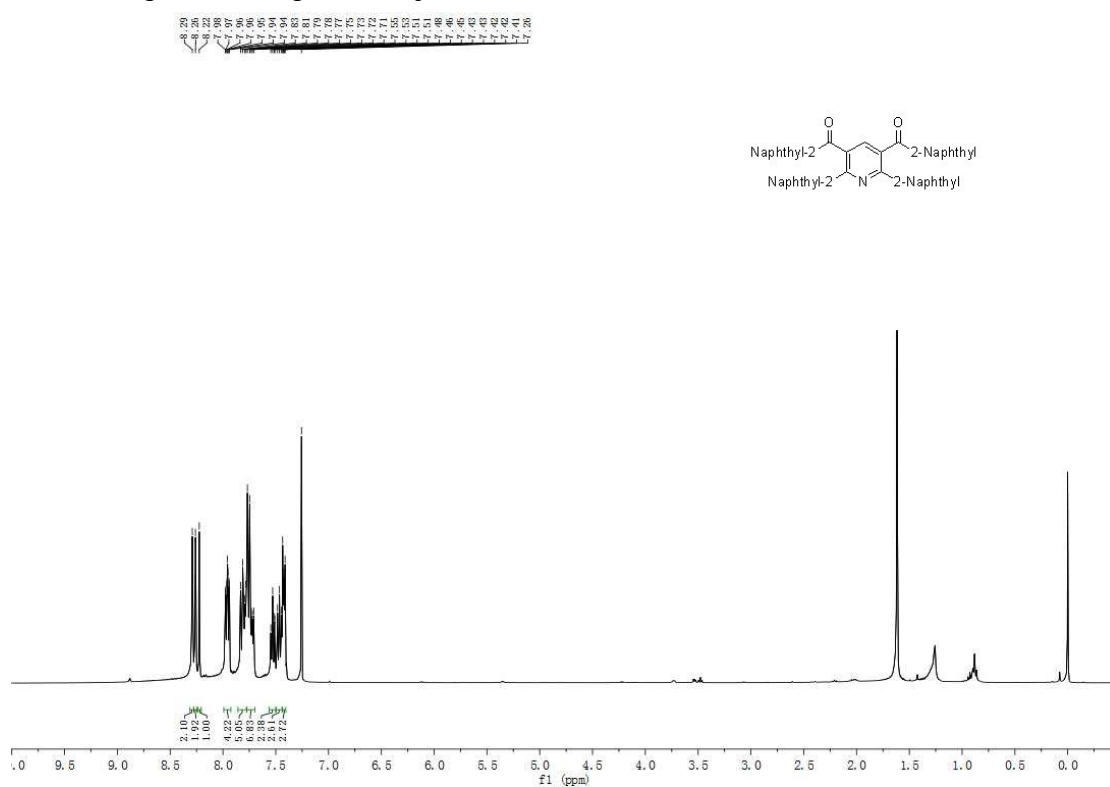

# <sup>13</sup>C NMR spectrum of product 4j

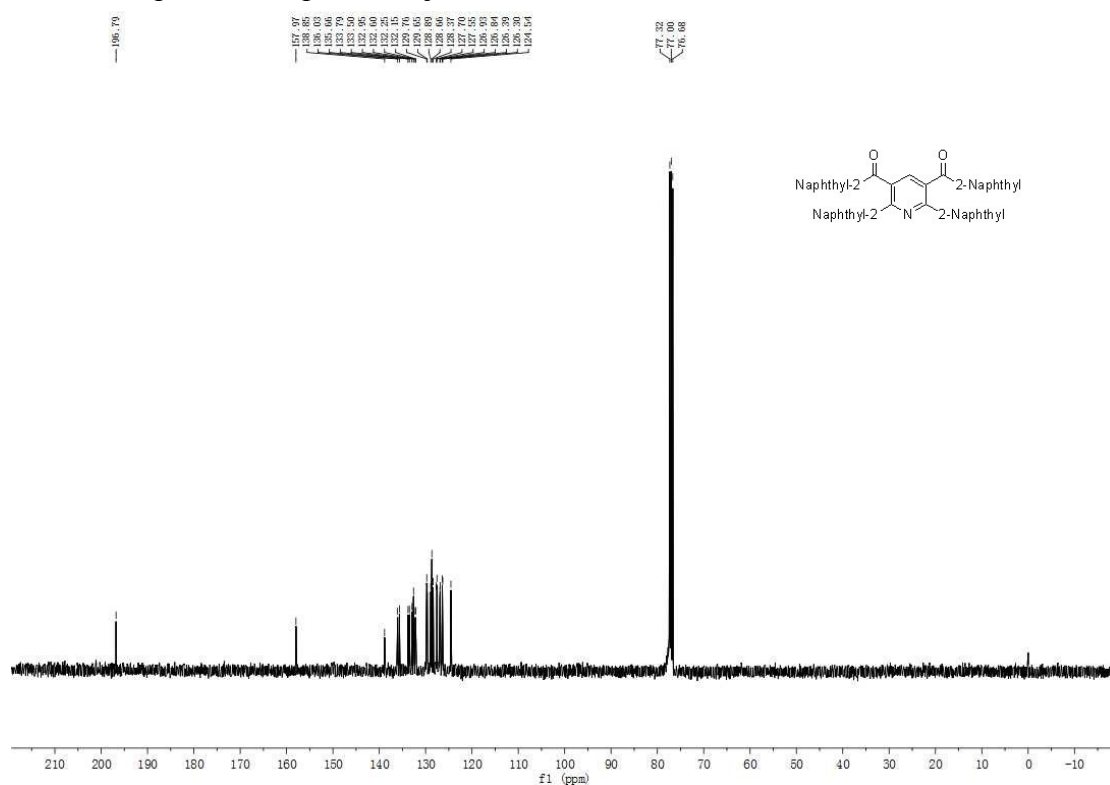

### $^1\text{H}$ NMR spectrum of product **4k**

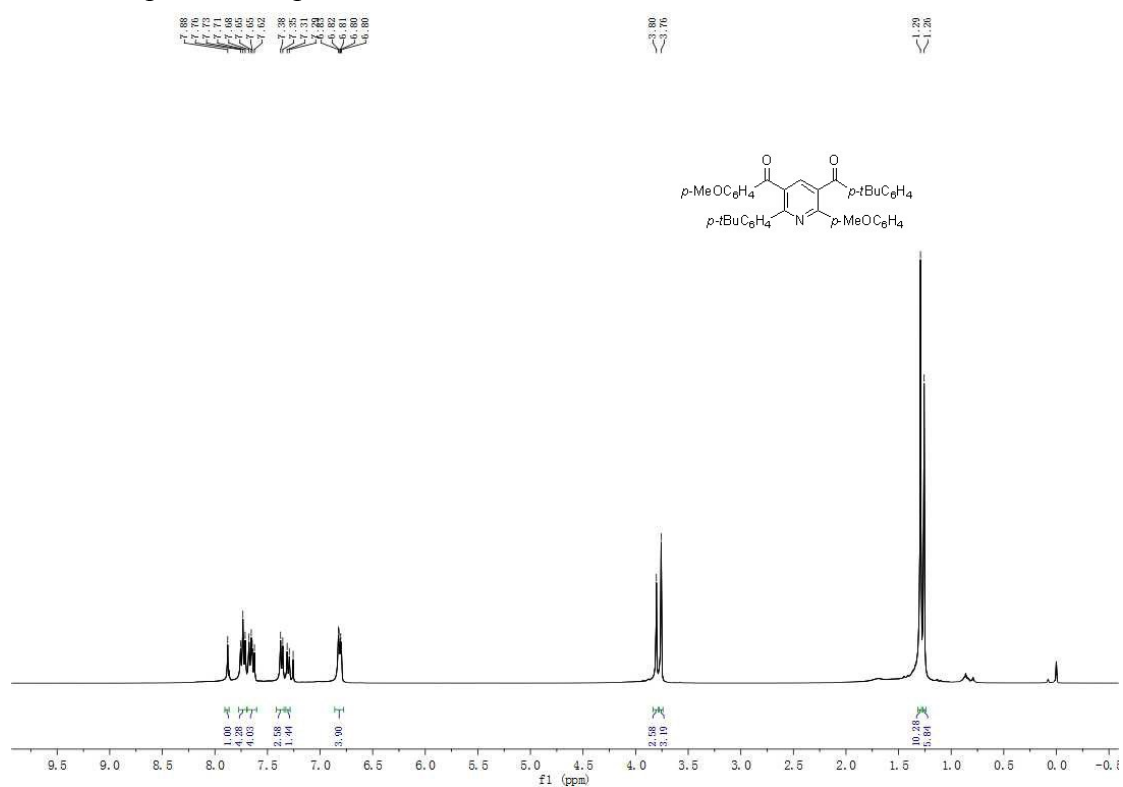

### $^{13}\text{C}$ NMR spectrum of product **4k**

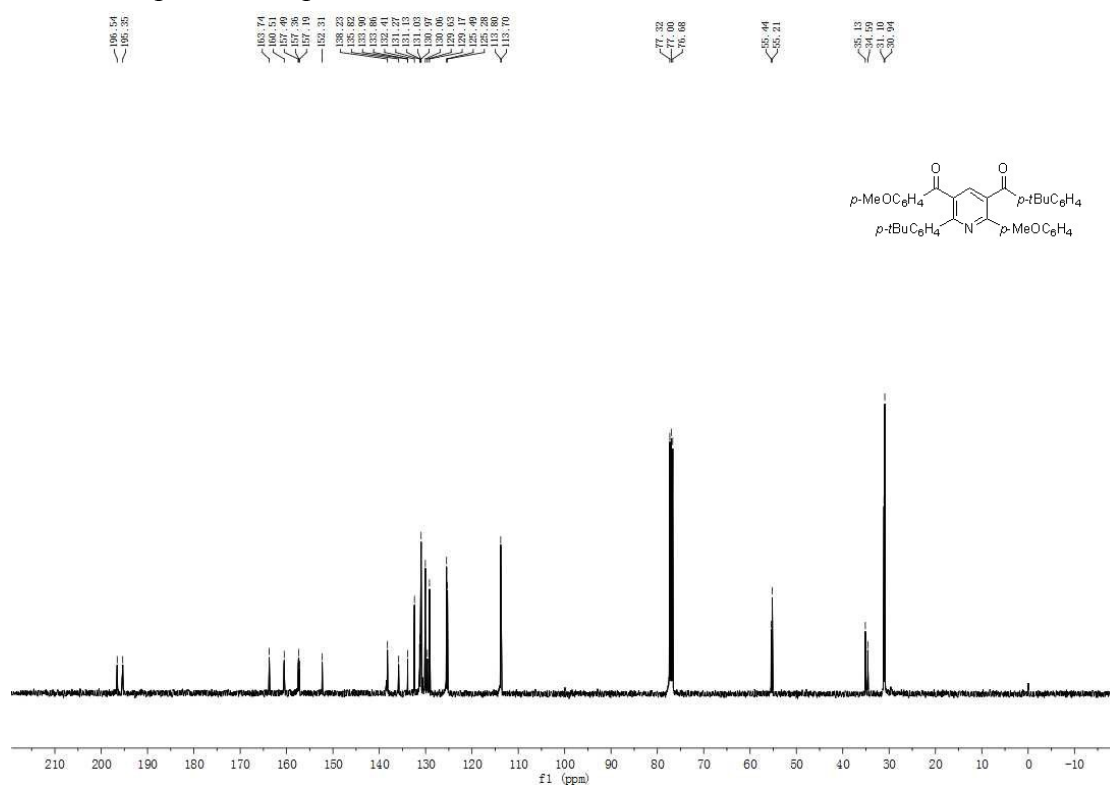

# <sup>1</sup>H NMR spectrum of product 4k'

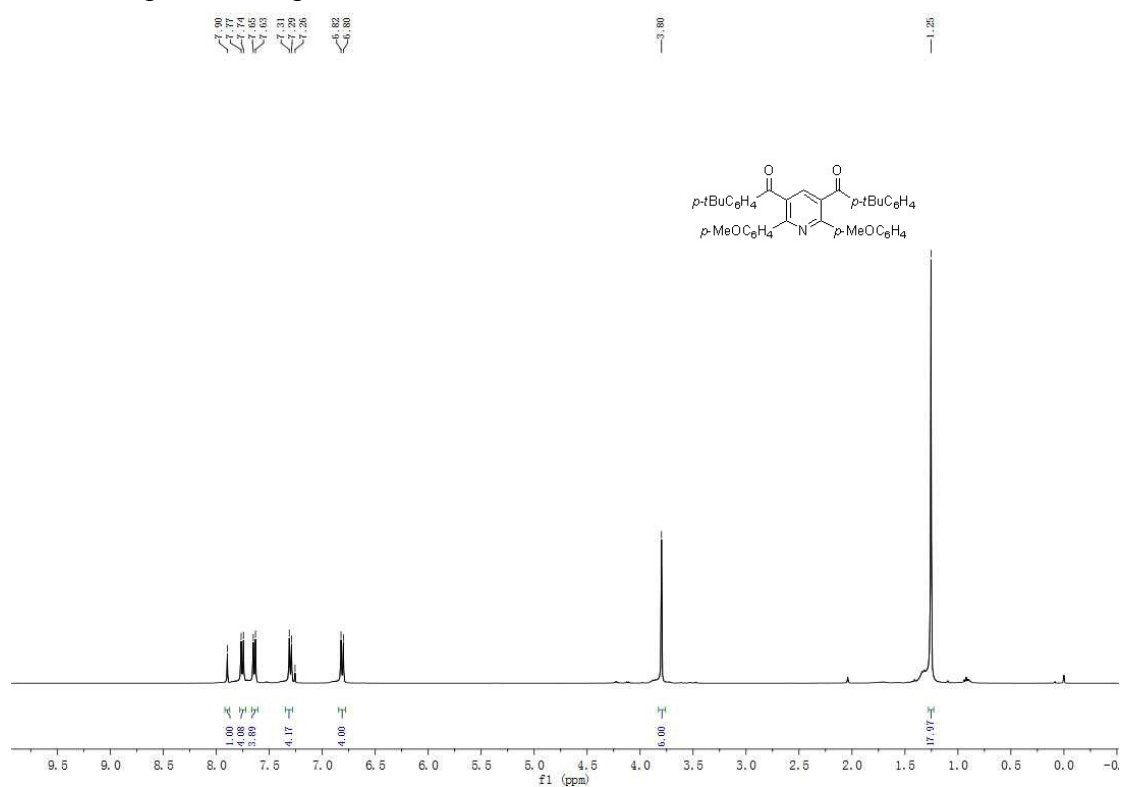

# <sup>13</sup>C NMR spectrum of product 4k'

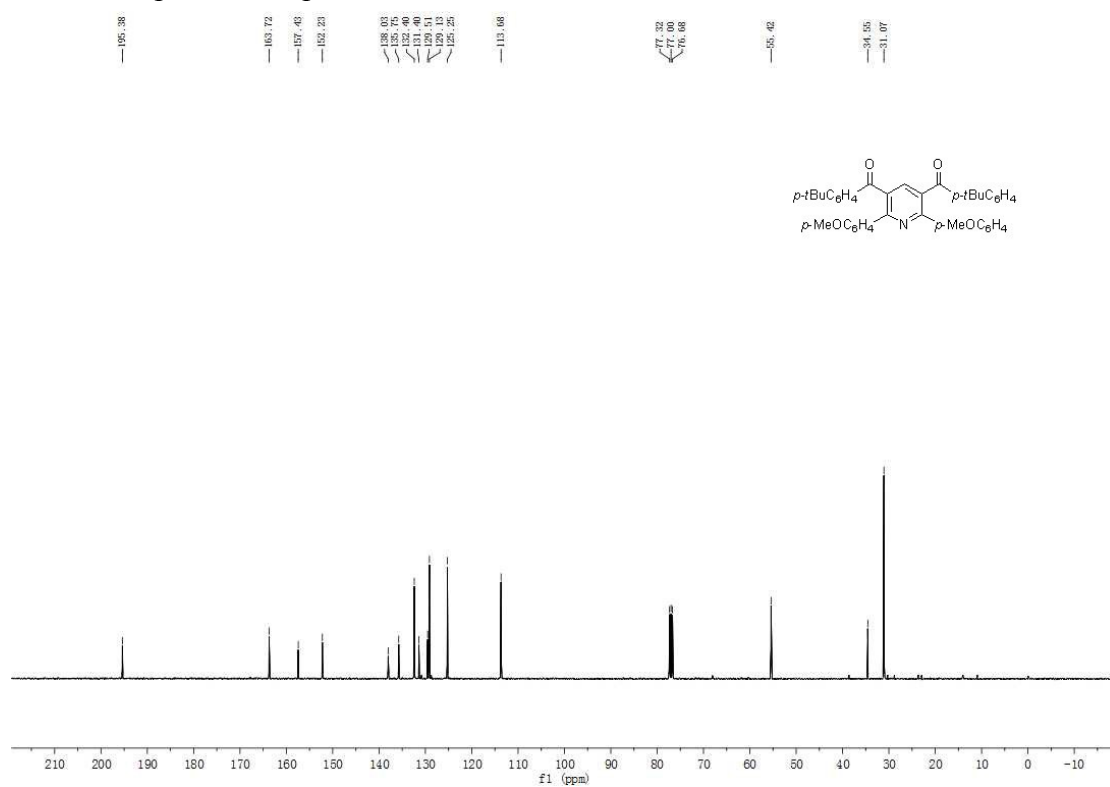

# <sup>1</sup>H NMR spectrum of product 41

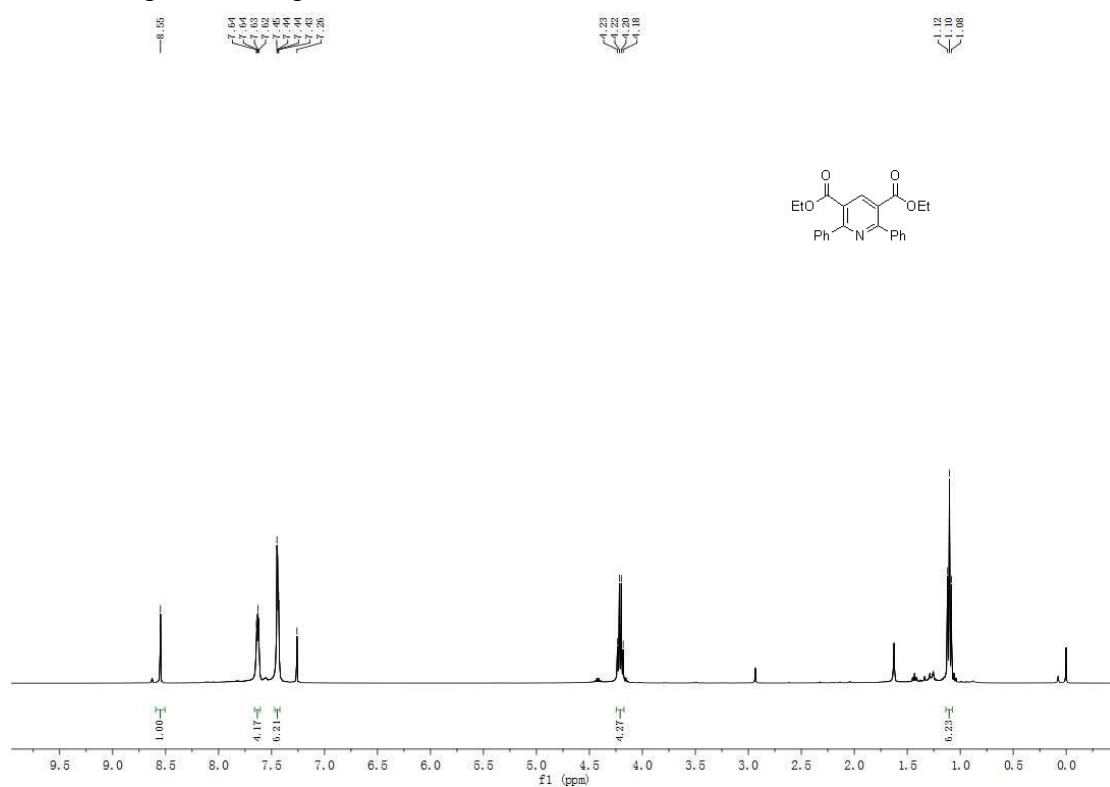

# <sup>13</sup>C NMR spectrum of product 41

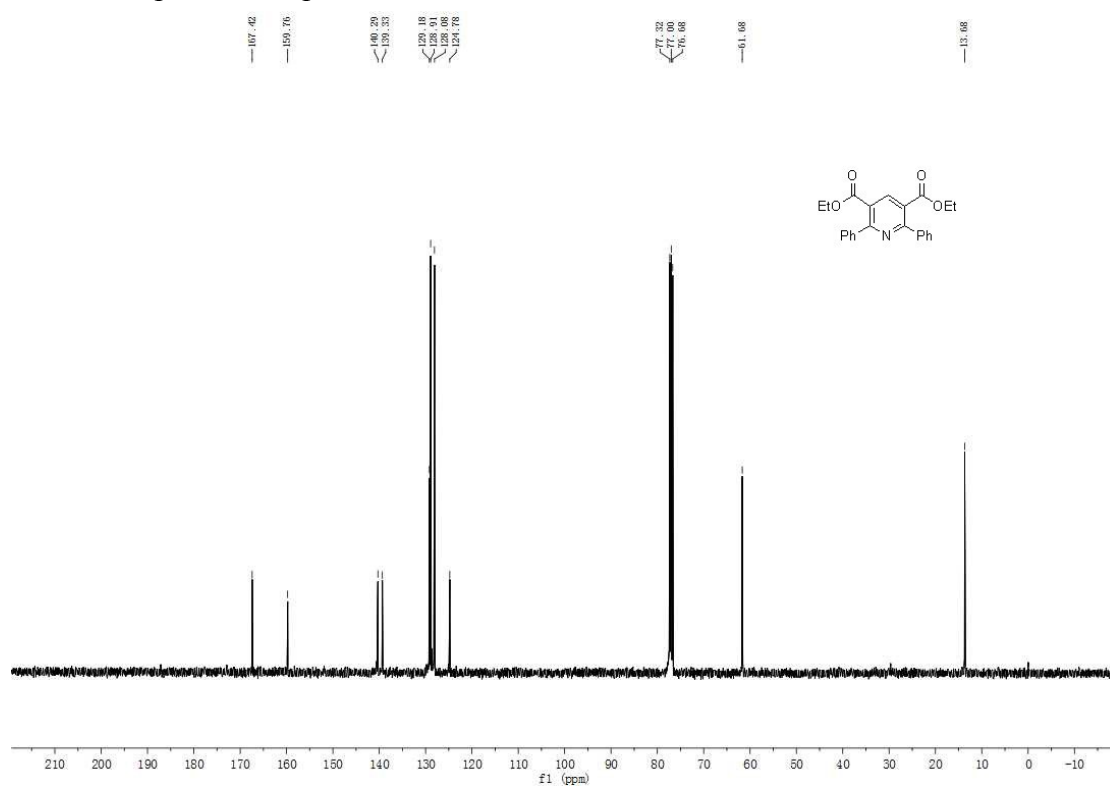

### <sup>1</sup>H NMR spectrum of product **4m**

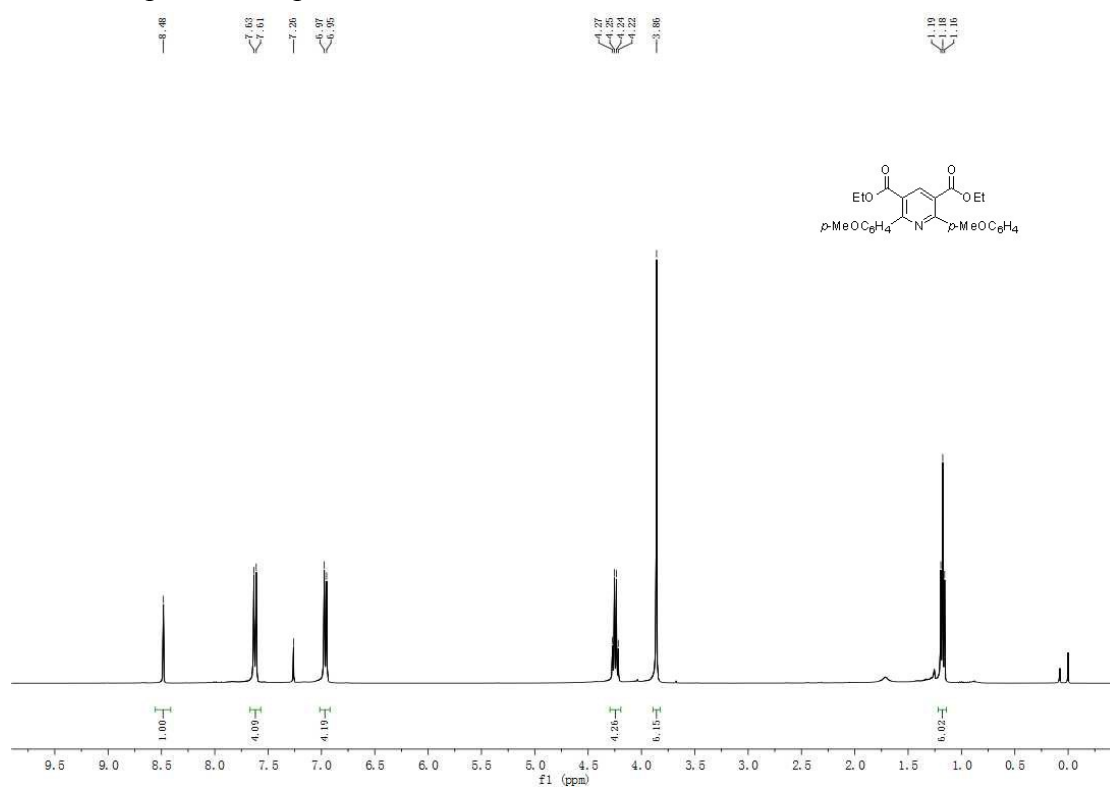

### <sup>13</sup>C NMR spectrum of product **4m**

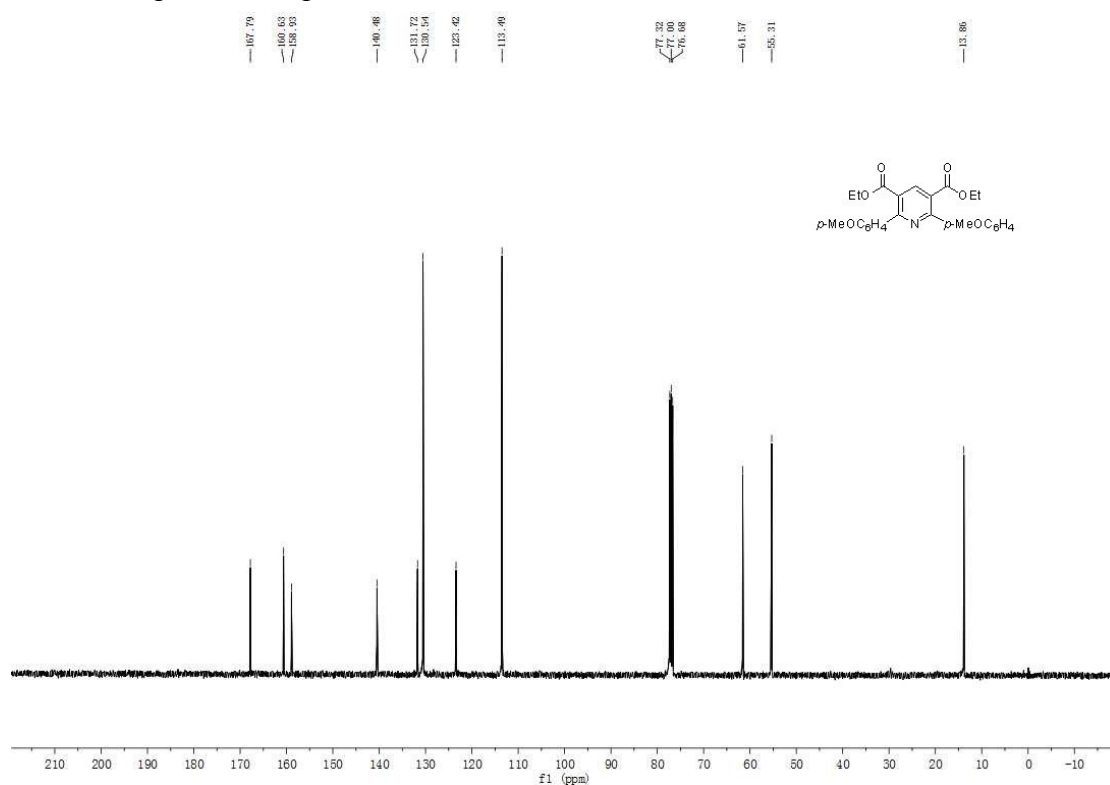

<sup>1</sup>H NMR spectrum of product **2a**

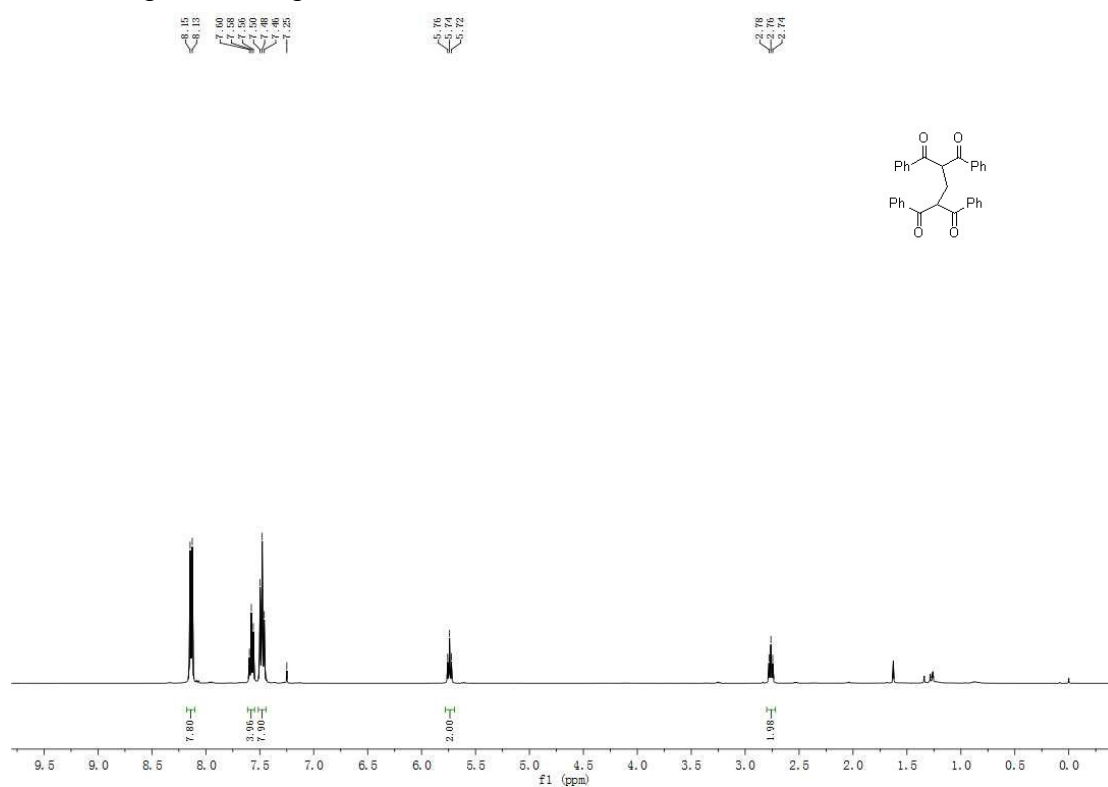

<sup>13</sup>C NMR spectrum of product **2a**

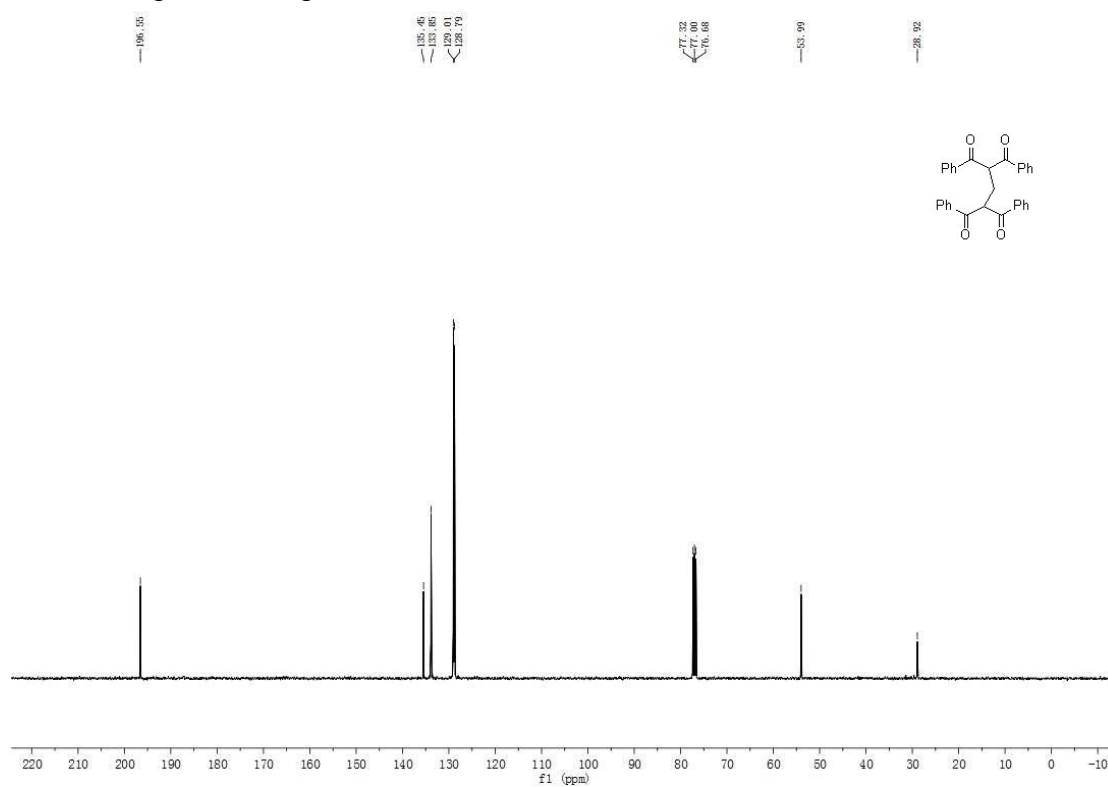



### <sup>1</sup>H NMR spectrum of product **2b**

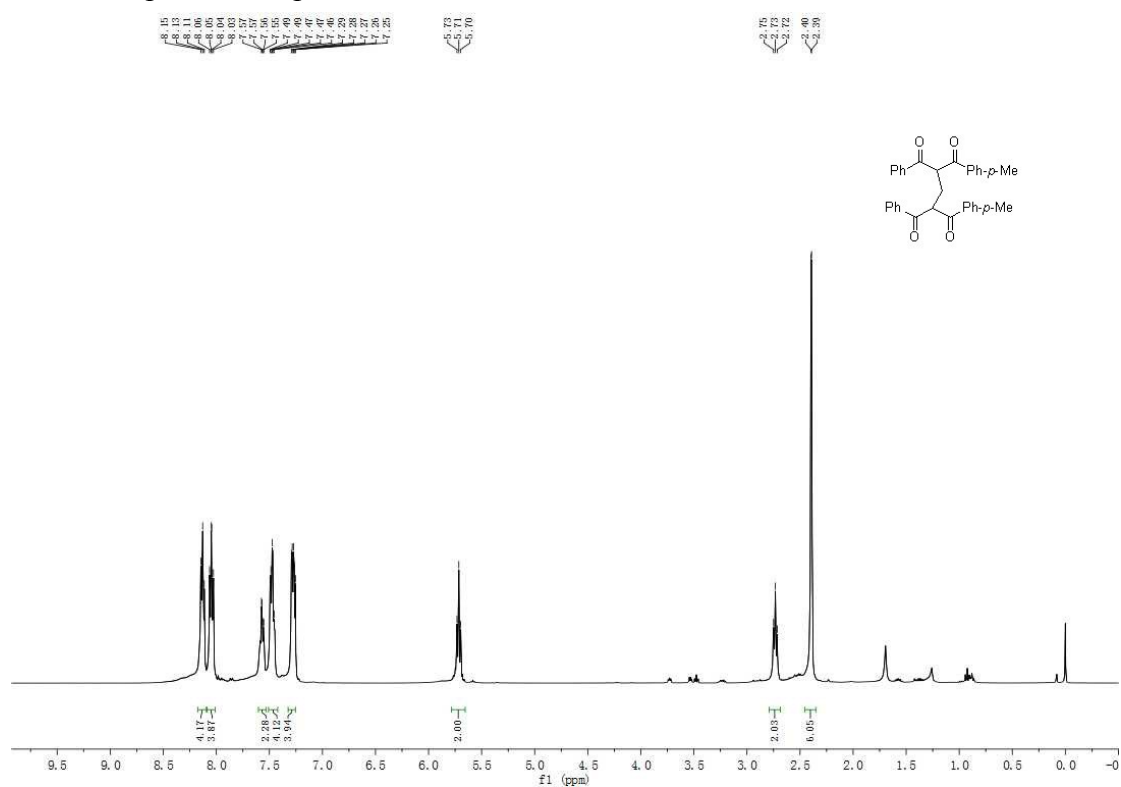

### <sup>13</sup>C NMR spectrum of product **2b**

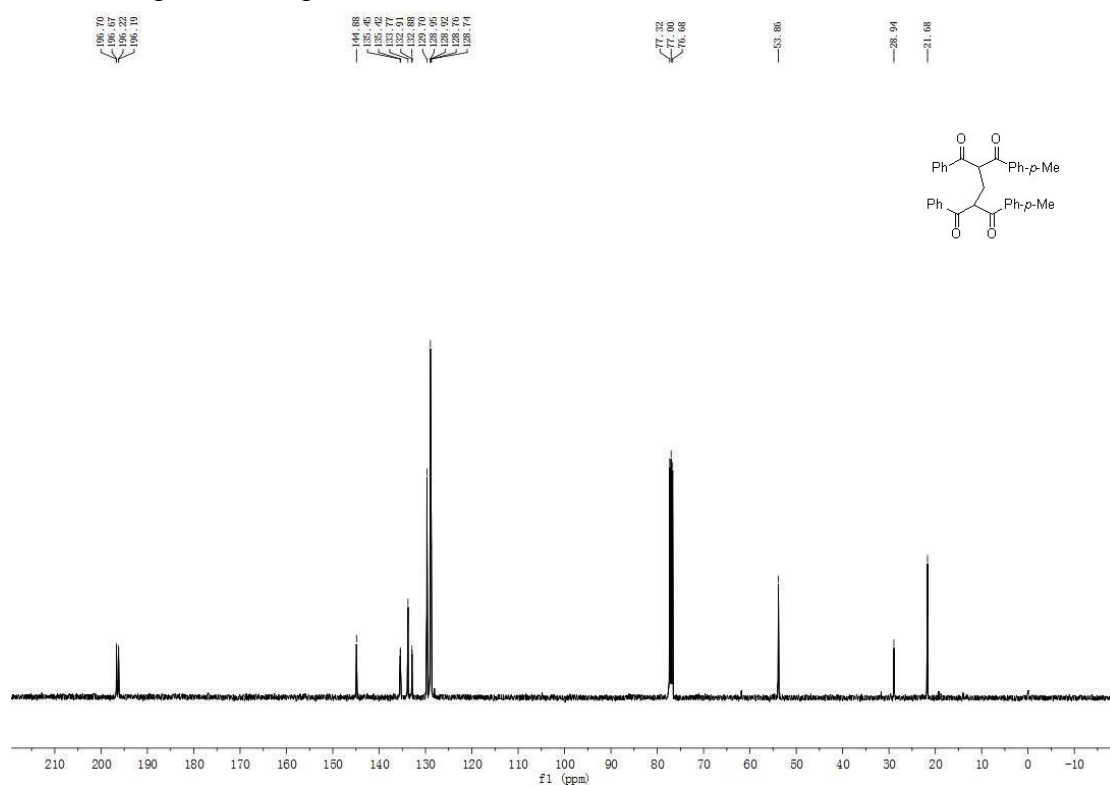

# <sup>1</sup>H NMR spectrum of product **2c**

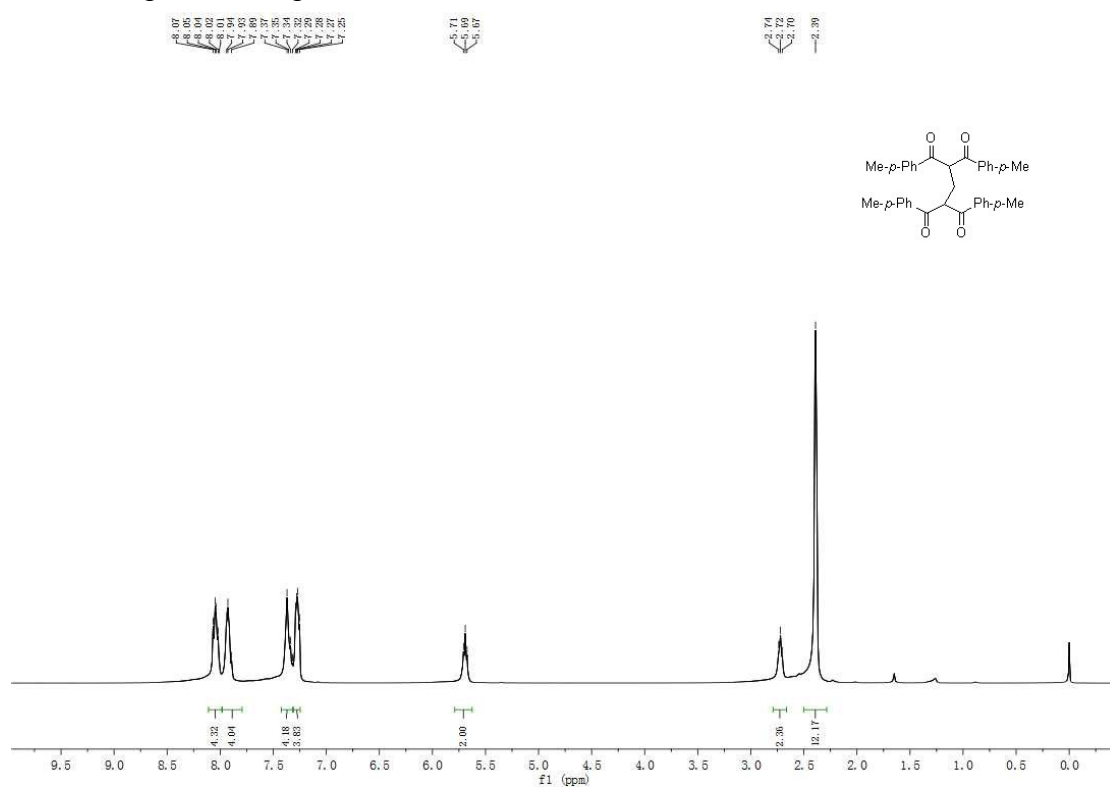

# <sup>13</sup>C NMR spectrum of product **2c**

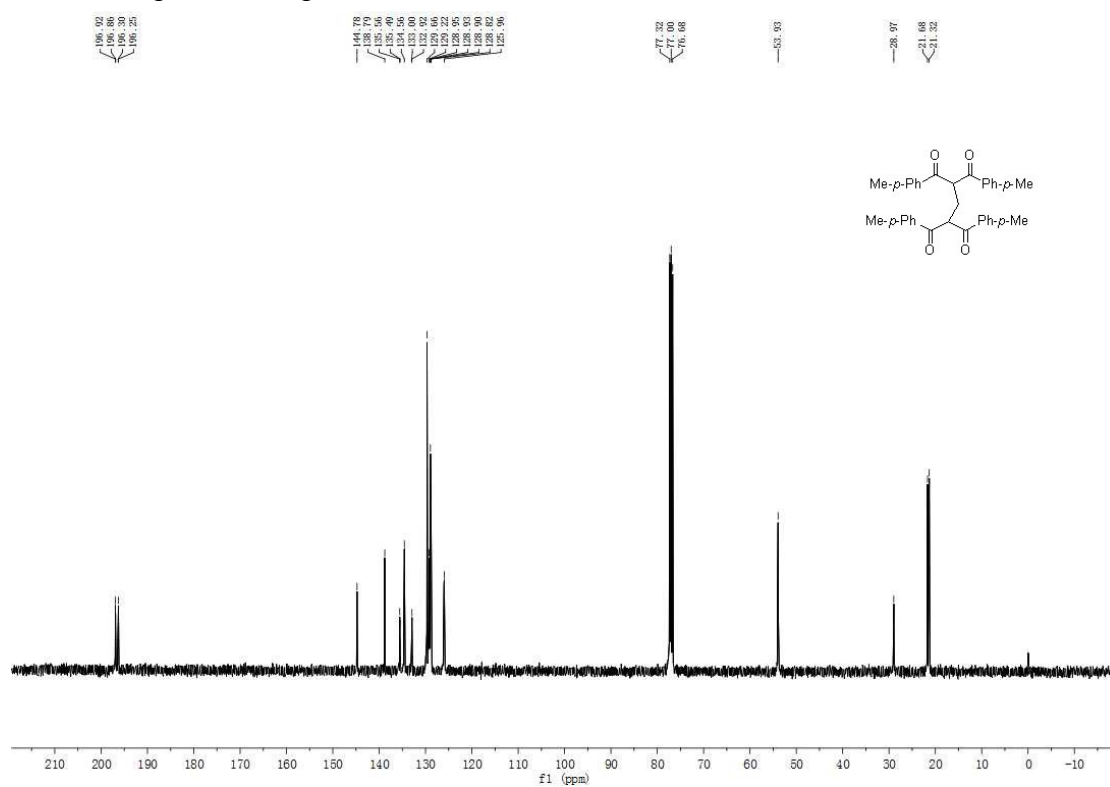

<sup>1</sup>H NMR spectrum of product **2d**

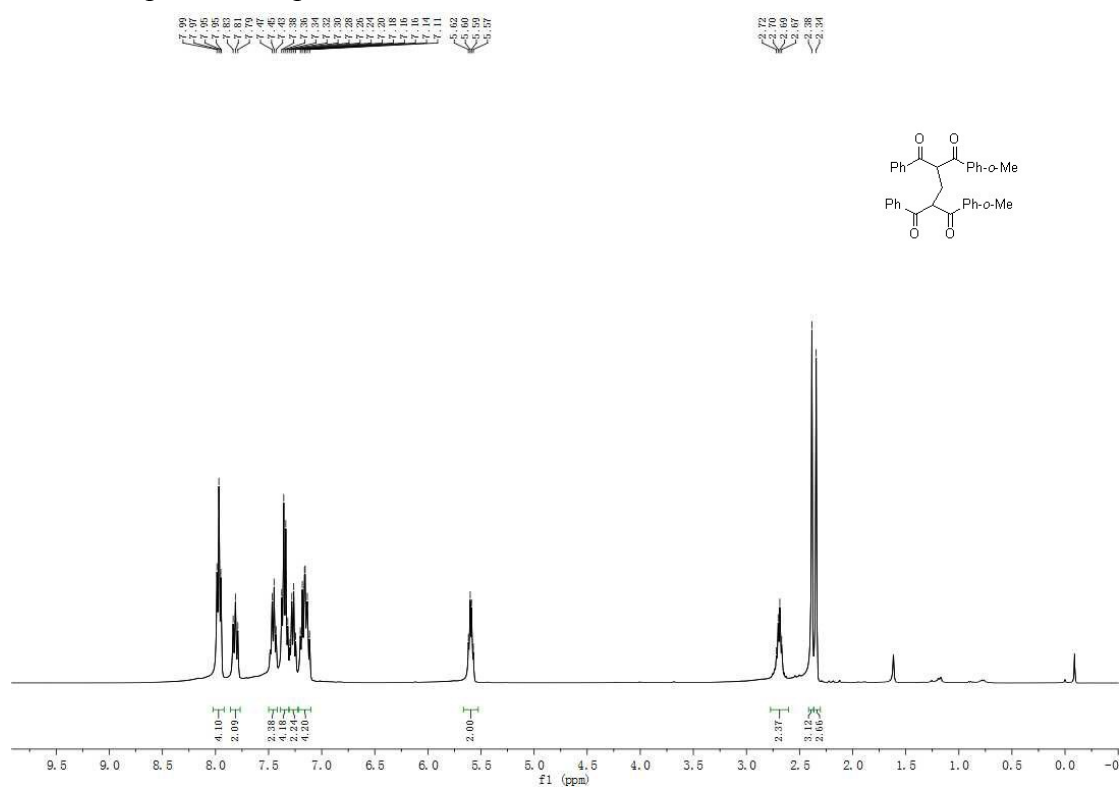

<sup>13</sup>C NMR spectrum of product **2d**

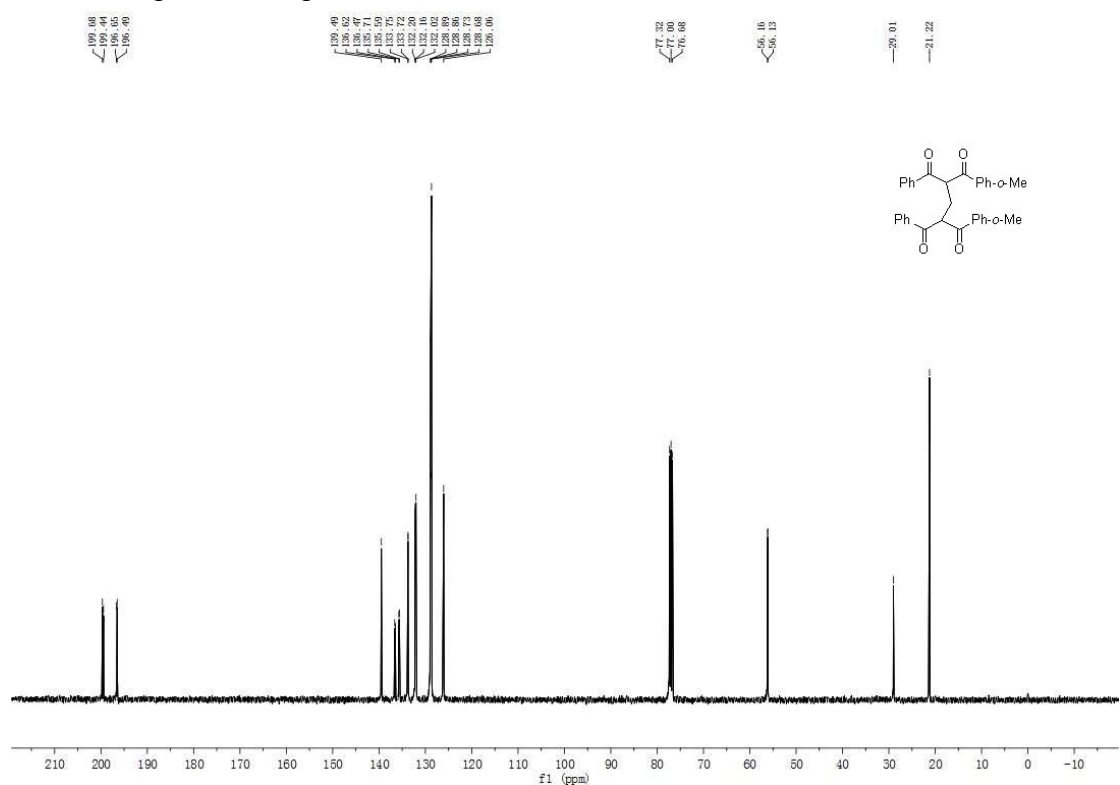

$^1\text{H}$  NMR spectrum of product **2a-d<sub>2</sub>**

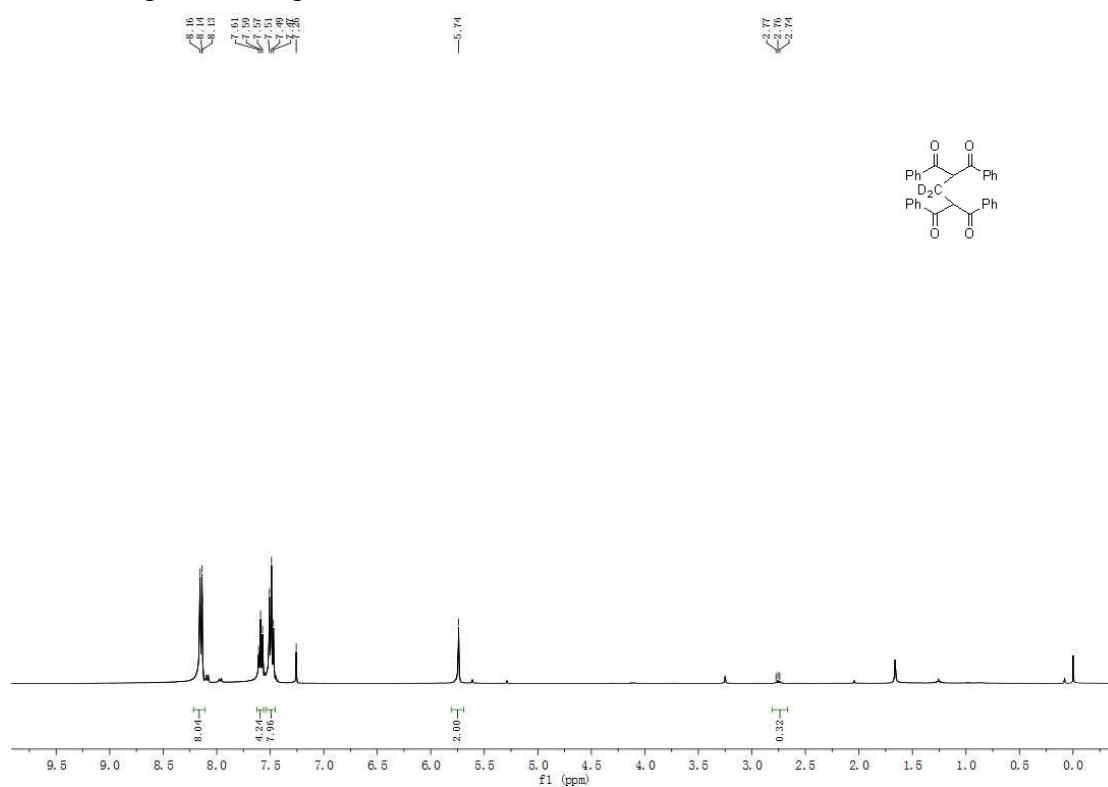

$^{13}\text{C}$  NMR spectrum of product **2a-d<sub>2</sub>**

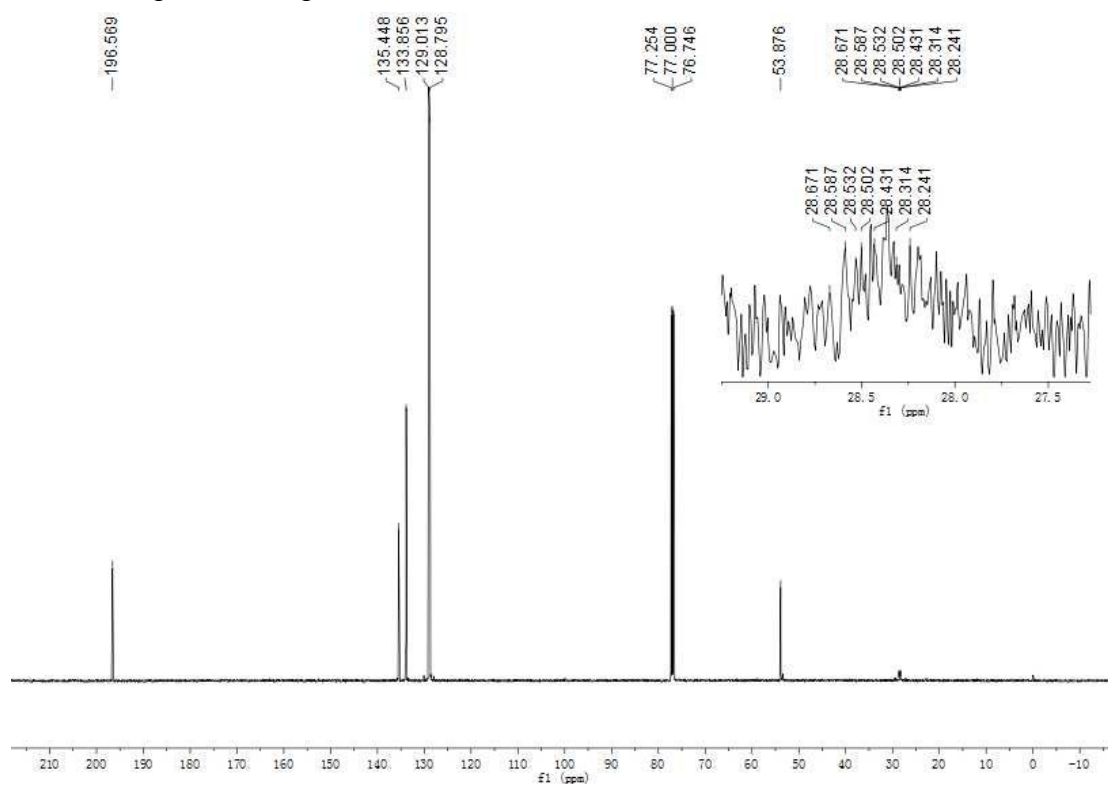

### <sup>1</sup>H NMR spectrum of product 5

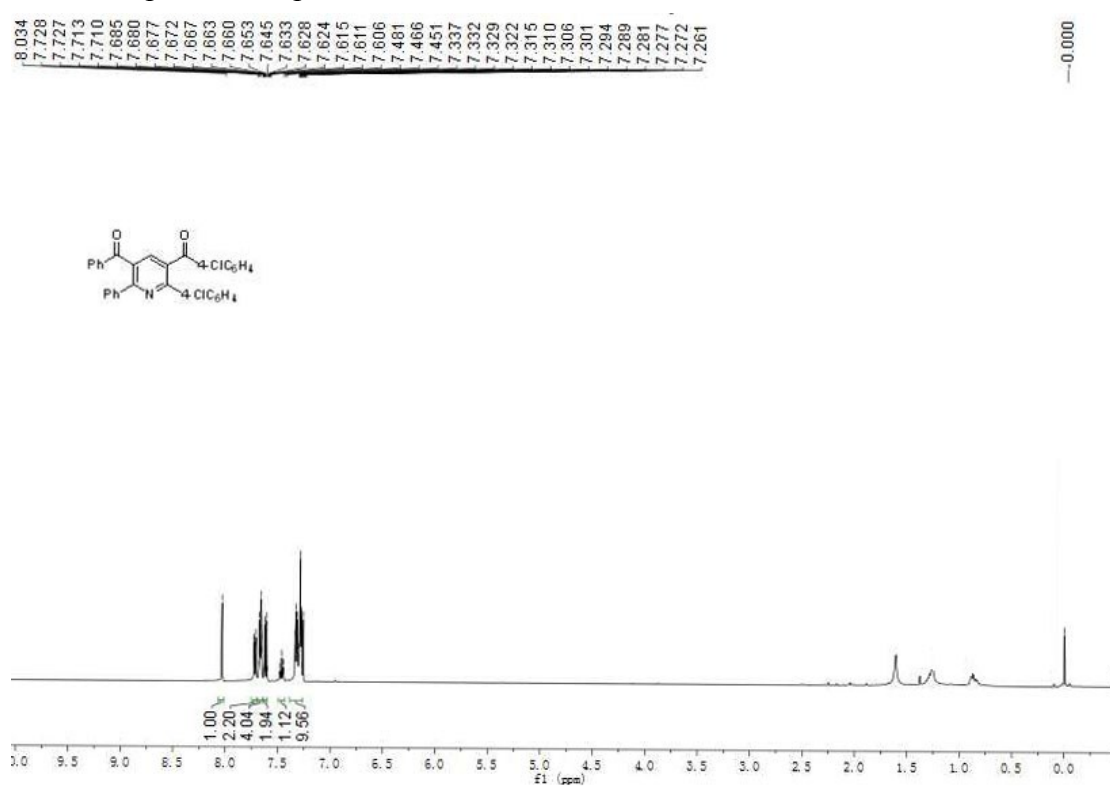

### <sup>13</sup>C NMR spectrum of product 5

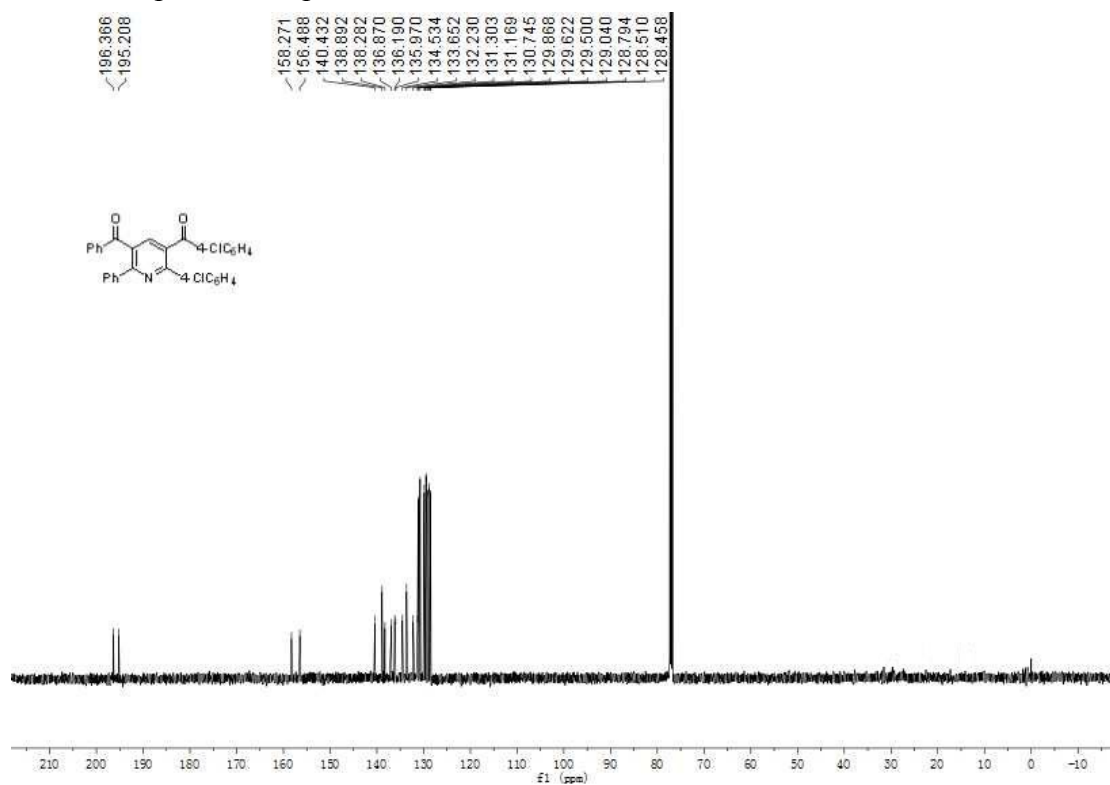

## X-ray Crystallographic Data of 4a

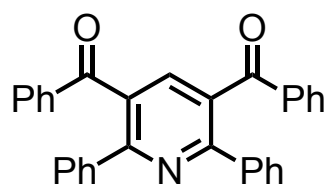

**4a**

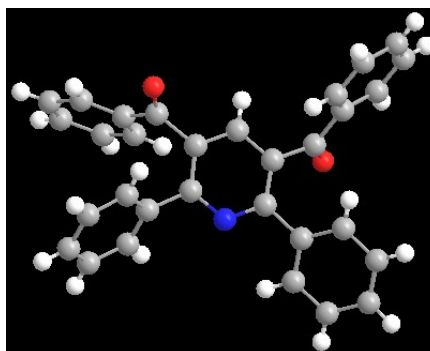

Table 1 Crystal data and structure refinement for 201209170.

|                                    |                                                               |
|------------------------------------|---------------------------------------------------------------|
| Identification code                | 201209170                                                     |
| Empirical formula                  | C <sub>31</sub> H <sub>21</sub> N <sub>1</sub> O <sub>2</sub> |
| Formula weight                     | 439.49                                                        |
| Temperature/K                      | 291.15                                                        |
| Crystal system                     | monoclinic                                                    |
| Space group                        | P2 <sub>1</sub> /n                                            |
| a/Å                                | 6.03713(8)                                                    |
| b/Å                                | 20.9196(3)                                                    |
| c/Å                                | 18.2183(3)                                                    |
| α /°                               | 90                                                            |
| β /°                               | 96.0714(14)                                                   |
| γ /°                               | 90                                                            |
| Volume/Å <sup>3</sup>              | 2287.96(6)                                                    |
| Z                                  | 4                                                             |
| ρ <sub>calc</sub> /cm <sup>3</sup> | 1.276                                                         |
| μ /mm <sup>-1</sup>                | 0.626                                                         |
| F(000)                             | 920.0                                                         |
| Crystal size/mm <sup>3</sup>       | 0.22 × 0.2 × 0.2                                              |
| Radiation                          | CuKα (λ = 1.54184)                                            |
| 2θ range for data collection/°     | 6.454 to 144.588                                              |
| Index ranges                       | -7 ≤ h ≤ 5, -25 ≤ k ≤ 25, -22 ≤ l ≤ 22                        |
| Reflections collected              | 17209                                                         |
| Independent reflections            | 4491 [R <sub>int</sub> = 0.0208, R <sub>sigma</sub> = 0.0163] |
| Data/restraints/parameters         | 4491/0/307                                                    |
| Goodness-of-fit on F <sup>2</sup>  | 1.043                                                         |
| Final R indexes [I ≥ 2σ (I)]       | R <sub>1</sub> = 0.0410, wR <sub>2</sub> = 0.1066             |
| Final R indexes [all data]         | R <sub>1</sub> = 0.0474, wR <sub>2</sub> = 0.1125             |

Largest diff. peak/hole / e  
 $\text{\AA}^{-3}$  0.16/-0.22

Table 2 Fractional Atomic Coordinates ( $\times 10^4$ ) and Equivalent Isotropic Displacement Parameters ( $\text{\AA}^2 \times 10^3$ ) for 201209170.  $U_{\text{eq}}$  is defined as 1/3 of of the trace of the orthogonalised  $U_{\text{IJ}}$  tensor.

| Atom            | $x$       | $y$        | $z$          | $U(\text{eq})$ |
|-----------------|-----------|------------|--------------|----------------|
| C <sub>1</sub>  | 633 (2)   | 6787.3 (5) | 8141.4 (7)   | 37.6 (3)       |
| C <sub>2</sub>  | 1953 (2)  | 6803.7 (6) | 8822.3 (7)   | 40.2 (3)       |
| C <sub>3</sub>  | 3646 (2)  | 6358.1 (6) | 8952.2 (7)   | 44.6 (3)       |
| C <sub>4</sub>  | 3928 (2)  | 5890.3 (6) | 8430.7 (7)   | 40.8 (3)       |
| C <sub>5</sub>  | 2501 (2)  | 5896.6 (5) | 7776.2 (7)   | 38.9 (3)       |
| C <sub>6</sub>  | -1110 (2) | 7276.5 (6) | 7926.9 (6)   | 38.8 (3)       |
| C <sub>7</sub>  | -3136 (2) | 7097.8 (6) | 7549.9 (8)   | 46.5 (3)       |
| C <sub>8</sub>  | -4761 (2) | 7547.7 (8) | 7340.8 (8)   | 54.3 (3)       |
| C <sub>9</sub>  | -4375 (3) | 8184.7 (7) | 7502.9 (9)   | 56.1 (4)       |
| C <sub>10</sub> | -2357 (3) | 8370.8 (7) | 7865.4 (8)   | 52.5 (3)       |
| C <sub>11</sub> | -728 (2)  | 7922.2 (6) | 8077.9 (7)   | 43.9 (3)       |
| C <sub>12</sub> | 1374 (2)  | 7215.1 (6) | 9454.9 (7)   | 42.9 (3)       |
| C <sub>13</sub> | 2998 (2)  | 7693.1 (6) | 9789.0 (7)   | 42.3 (3)       |
| C <sub>14</sub> | 2572 (3)  | 7988.0 (7) | 10448.1 (8)  | 55.8 (4)       |
| C <sub>15</sub> | 4051 (3)  | 8429.2 (9) | 10776.1 (9)  | 69.8 (5)       |
| C <sub>16</sub> | 5942 (3)  | 8586.6 (8) | 10452.2 (10) | 68.6 (5)       |
| C <sub>17</sub> | 6376 (3)  | 8302.6 (7) | 9802.3 (9)   | 57.0 (4)       |
| C <sub>18</sub> | 4910 (2)  | 7852.6 (6) | 9470.9 (7)   | 46.8 (3)       |
| C <sub>19</sub> | 5676 (2)  | 5381.2 (6) | 8591.6 (7)   | 44.5 (3)       |
| C <sub>20</sub> | 4897 (2)  | 4734.2 (6) | 8784.6 (7)   | 42.4 (3)       |
| C <sub>21</sub> | 6256 (3)  | 4212.4 (7) | 8692.9 (8)   | 54.2 (3)       |
| C <sub>22</sub> | 5590 (3)  | 3606.1 (8) | 8865.0 (9)   | 64.9 (4)       |
| C <sub>23</sub> | 3605 (3)  | 3516.8 (8) | 9156.3 (9)   | 61.8 (4)       |
| C <sub>24</sub> | 2262 (3)  | 4031.9 (9) | 9264.5 (10)  | 66.9 (4)       |
| C <sub>25</sub> | 2879 (2)  | 4640.2 (8) | 9066.5 (9)   | 57.8 (4)       |
| C <sub>26</sub> | 2709 (2)  | 5419.9 (6) | 7176.4 (7)   | 41.0 (3)       |
| C <sub>27</sub> | 4649 (2)  | 5370.1 (7) | 6839.2 (9)   | 55.6 (4)       |

|                 |             |            |             |          |
|-----------------|-------------|------------|-------------|----------|
| C <sub>28</sub> | 4775 (3)    | 4955.0 (9) | 6250.4 (10) | 65.6 (4) |
| C <sub>29</sub> | 3006 (3)    | 4574.1 (8) | 6014.9 (10) | 67.1 (4) |
| C <sub>30</sub> | 1089 (3)    | 4612.2 (9) | 6354.7 (12) | 74.9 (5) |
| C <sub>31</sub> | 930 (3)     | 5037.0 (8) | 6928.6 (10) | 60.5 (4) |
| N <sub>1</sub>  | 912.0 (17)  | 6339.2 (5) | 7633.0 (6)  | 39.2 (2) |
| O <sub>1</sub>  | -407.8 (18) | 7125.9 (5) | 9692.5 (6)  | 60.5 (3) |
| O <sub>2</sub>  | 7627.8 (18) | 5503.5 (6) | 8568.8 (9)  | 74.9 (4) |

**Table 3 Anisotropic Displacement Parameters ( $\text{\AA}^2 \times 10^3$ ) for 201209170.**

The Anisotropic displacement factor exponent takes the form: -

$$2 \pi^2 [h^2 a^2 U_{11} + 2 h k a^* b^* U_{12} + \dots].$$

| Atom            | U <sub>11</sub> | U <sub>22</sub> | U <sub>33</sub> | U <sub>23</sub> | U <sub>13</sub> | U <sub>12</sub> |
|-----------------|-----------------|-----------------|-----------------|-----------------|-----------------|-----------------|
| C <sub>1</sub>  | 40.5 (6)        | 33.2 (5)        | 39.8 (6)        | 1.6 (4)         | 7.3 (5)         | -0.6 (4)        |
| C <sub>2</sub>  | 44.7 (6)        | 37.5 (6)        | 38.8 (6)        | -0.6 (5)        | 6.8 (5)         | 0.9 (5)         |
| C <sub>3</sub>  | 48.0 (7)        | 47.7 (7)        | 37.2 (6)        | -1.1 (5)        | 0.8 (5)         | 4.8 (5)         |
| C <sub>4</sub>  | 42.0 (6)        | 37.4 (6)        | 43.5 (6)        | 1.4 (5)         | 6.2 (5)         | 2.4 (5)         |
| C <sub>5</sub>  | 41.3 (6)        | 33.1 (5)        | 42.6 (6)        | -0.3 (5)        | 6.0 (5)         | -2.0 (5)        |
| C <sub>6</sub>  | 43.1 (6)        | 37.9 (6)        | 36.3 (6)        | 2.0 (4)         | 8.1 (5)         | 2.1 (5)         |
| C <sub>7</sub>  | 46.1 (7)        | 44.1 (7)        | 49.6 (7)        | -0.7 (5)        | 6.2 (5)         | -1.3 (5)        |
| C <sub>8</sub>  | 43.1 (7)        | 65.8 (9)        | 53.5 (8)        | 5.5 (7)         | 2.7 (6)         | 2.9 (6)         |
| C <sub>9</sub>  | 58.6 (8)        | 56.5 (8)        | 53.7 (8)        | 12.8 (6)        | 8.7 (6)         | 18.9 (7)        |
| C <sub>10</sub> | 67.7 (9)        | 38.5 (6)        | 51.6 (8)        | 4.7 (6)         | 8.3 (6)         | 8.2 (6)         |
| C <sub>11</sub> | 50.6 (7)        | 38.4 (6)        | 42.6 (6)        | 1.2 (5)         | 4.2 (5)         | 1.2 (5)         |
| C <sub>12</sub> | 51.1 (7)        | 41.9 (6)        | 36.4 (6)        | 3.6 (5)         | 7.6 (5)         | 8.3 (5)         |
| C <sub>13</sub> | 54.2 (7)        | 39.1 (6)        | 33.1 (6)        | 1.7 (5)         | 1.6 (5)         | 9.9 (5)         |
| C <sub>14</sub> | 71.6 (9)        | 57.1 (8)        | 39.7 (7)        | -4.6 (6)        | 10.5 (6)        | 8.1 (7)         |
| C <sub>15</sub> | 94.8 (13)       | 68.7 (10)       | 45.3 (8)        | -20.3 (7)       | 5.1 (8)         | 1.4 (9)         |
| C <sub>16</sub> | 82.7 (12)       | 58.9 (9)        | 60.6 (10)       | -14.2 (7)       | -9.2 (8)        | -5.7 (8)        |
| C <sub>17</sub> | 59.3 (8)        | 53.1 (8)        | 57.6 (8)        | -2.5 (6)        | 0.9 (7)         | -0.5 (6)        |
| C <sub>18</sub> | 56.5 (7)        | 44.4 (7)        | 39.2 (6)        | -3.2 (5)        | 3.5 (5)         | 6.8 (6)         |
| C <sub>19</sub> | 40.6 (6)        | 46.4 (7)        | 46.4 (7)        | 0.0 (5)         | 4.5 (5)         | 4.6 (5)         |
| C <sub>20</sub> | 40.8 (6)        | 46.0 (7)        | 39.4 (6)        | 2.9 (5)         | 0.0 (5)         | 6.6 (5)         |
| C <sub>21</sub> | 58.8 (8)        | 51.6 (8)        | 54.1 (8)        | 7.0 (6)         | 14.5 (6)        | 14.6 (6)        |
| C <sub>22</sub> | 88.3 (12)       | 48.1 (8)        | 59.7 (9)        | 7.9 (7)         | 14.2 (8)        | 17.6 (8)        |
| C <sub>23</sub> | 76.7 (10)       | 51.0 (8)        | 54.4 (8)        | 14.8 (6)        | -8.8 (7)        | -4.8 (7)        |
| C <sub>24</sub> | 48.4 (8)        | 73 (1)          | 78.5 (11)       | 25.5 (9)        | 3.7 (7)         | -3.1 (7)        |
| C <sub>25</sub> | 44.6 (7)        | 56.7 (8)        | 72.5 (10)       | 14.2 (7)        | 7.8 (7)         | 10.3 (6)        |
| C <sub>26</sub> | 45.6 (6)        | 32.9 (6)        | 43.9 (6)        | -1.8 (5)        | 1.0 (5)         | 3.2 (5)         |



|                 |           |           |            |           |          |           |
|-----------------|-----------|-----------|------------|-----------|----------|-----------|
| C <sub>27</sub> | 49.1 (7)  | 54.0 (8)  | 64.2 (9)   | -16.7 (7) | 8.8 (6)  | -5.1 (6)  |
| C <sub>28</sub> | 59.5 (9)  | 70.4 (10) | 68.7 (10)  | -21.0 (8) | 15.1 (8) | 6.5 (8)   |
| C <sub>29</sub> | 77.6 (11) | 56.6 (9)  | 65.7 (10)  | -26.8 (8) | 0.8 (8)  | 8.5 (8)   |
| C <sub>30</sub> | 69.6 (11) | 67.7 (10) | 86.5 (12)  | -34.4 (9) | 4.5 (9)  | -17.7 (8) |
| C <sub>31</sub> | 53.3 (8)  | 59.2 (9)  | 69.7 (10)  | -18.6 (7) | 10.8 (7) | -9.7 (7)  |
| N <sub>1</sub>  | 42.4 (5)  | 35.2 (5)  | 39.8 (5)   | -0.9 (4)  | 3.7 (4)  | 0.8 (4)   |
| O <sub>1</sub>  | 59.9 (6)  | 67.0 (7)  | 57.8 (6)   | -6.9 (5)  | 21.7 (5) | -1.3 (5)  |
| O <sub>2</sub>  | 43.0 (6)  | 62.4 (7)  | 120.4 (11) | 16.0 (7)  | 14.2 (6) | 2.7 (5)   |

**Table 4 Bond Lengths for 201209170.**

| Atom            | Atom            | Length/Å    | Atom            | Atom            | Length/Å    |
|-----------------|-----------------|-------------|-----------------|-----------------|-------------|
| C <sub>1</sub>  | C <sub>2</sub>  | 1.4022 (17) | C <sub>13</sub> | C <sub>18</sub> | 1.386 (2)   |
| C <sub>1</sub>  | C <sub>6</sub>  | 1.4902 (16) | C <sub>14</sub> | C <sub>15</sub> | 1.376 (2)   |
| C <sub>1</sub>  | N <sub>1</sub>  | 1.3409 (16) | C <sub>15</sub> | C <sub>16</sub> | 1.379 (3)   |
| C <sub>2</sub>  | C <sub>3</sub>  | 1.3850 (18) | C <sub>16</sub> | C <sub>17</sub> | 1.375 (2)   |
| C <sub>2</sub>  | C <sub>12</sub> | 1.5087 (17) | C <sub>17</sub> | C <sub>18</sub> | 1.386 (2)   |
| C <sub>3</sub>  | C <sub>4</sub>  | 1.3870 (18) | C <sub>19</sub> | C <sub>20</sub> | 1.4870 (18) |
| C <sub>4</sub>  | C <sub>5</sub>  | 1.3952 (18) | C <sub>19</sub> | O <sub>2</sub>  | 1.2110 (17) |
| C <sub>4</sub>  | C <sub>19</sub> | 1.5060 (17) | C <sub>20</sub> | C <sub>21</sub> | 1.3860 (18) |
| C <sub>5</sub>  | C <sub>26</sub> | 1.4944 (17) | C <sub>20</sub> | C <sub>25</sub> | 1.386 (2)   |
| C <sub>5</sub>  | N <sub>1</sub>  | 1.3390 (16) | C <sub>21</sub> | C <sub>22</sub> | 1.377 (2)   |
| C <sub>6</sub>  | C <sub>7</sub>  | 1.3891 (18) | C <sub>22</sub> | C <sub>23</sub> | 1.373 (2)   |
| C <sub>6</sub>  | C <sub>11</sub> | 1.3929 (17) | C <sub>23</sub> | C <sub>24</sub> | 1.375 (3)   |
| C <sub>7</sub>  | C <sub>8</sub>  | 1.384 (2)   | C <sub>24</sub> | C <sub>25</sub> | 1.384 (2)   |
| C <sub>8</sub>  | C <sub>9</sub>  | 1.379 (2)   | C <sub>26</sub> | C <sub>27</sub> | 1.383 (2)   |
| C <sub>9</sub>  | C <sub>10</sub> | 1.379 (2)   | C <sub>26</sub> | C <sub>31</sub> | 1.3772 (19) |
| C <sub>10</sub> | C <sub>11</sub> | 1.3847 (19) | C <sub>27</sub> | C <sub>28</sub> | 1.388 (2)   |
| C <sub>12</sub> | C <sub>13</sub> | 1.4852 (19) | C <sub>28</sub> | C <sub>29</sub> | 1.365 (2)   |
| C <sub>12</sub> | O <sub>1</sub>  | 1.2158 (17) | C <sub>29</sub> | C <sub>30</sub> | 1.372 (3)   |
| C <sub>13</sub> | C <sub>14</sub> | 1.3978 (18) | C <sub>30</sub> | C <sub>31</sub> | 1.383 (2)   |

**Table 5 Bond Angles for 201209170.**

| Atom           | Atom           | Atom           | Angle/      | Atom            | Atom            | Atom            | Angle/      |
|----------------|----------------|----------------|-------------|-----------------|-----------------|-----------------|-------------|
| C <sub>2</sub> | C <sub>1</sub> | C <sub>6</sub> | 122.33 (11) | C <sub>18</sub> | C <sub>13</sub> | C <sub>14</sub> | 119.34 (13) |
| N <sub>1</sub> | C <sub>1</sub> | C <sub>2</sub> | 121.79 (11) | C <sub>15</sub> | C <sub>14</sub> | C <sub>13</sub> | 119.95 (15) |

|                 |                 |                 |             |                 |                 |                 |             |
|-----------------|-----------------|-----------------|-------------|-----------------|-----------------|-----------------|-------------|
| N <sub>1</sub>  | C <sub>1</sub>  | C <sub>6</sub>  | 115.85 (11) | C <sub>14</sub> | C <sub>15</sub> | C <sub>16</sub> | 120.19 (15) |
| C <sub>1</sub>  | C <sub>2</sub>  | C <sub>12</sub> | 122.27 (11) | C <sub>17</sub> | C <sub>16</sub> | C <sub>15</sub> | 120.47 (16) |
| C <sub>3</sub>  | C <sub>2</sub>  | C <sub>1</sub>  | 118.35 (11) | C <sub>16</sub> | C <sub>17</sub> | C <sub>18</sub> | 119.84 (16) |
| C <sub>3</sub>  | C <sub>2</sub>  | C <sub>12</sub> | 118.67 (11) | C <sub>13</sub> | C <sub>18</sub> | C <sub>17</sub> | 120.21 (13) |
| C <sub>2</sub>  | C <sub>3</sub>  | C <sub>4</sub>  | 119.98 (12) | C <sub>20</sub> | C <sub>19</sub> | C <sub>4</sub>  | 117.22 (11) |
| C <sub>3</sub>  | C <sub>4</sub>  | C <sub>5</sub>  | 118.00 (11) | O <sub>2</sub>  | C <sub>19</sub> | C <sub>4</sub>  | 120.54 (12) |
| C <sub>3</sub>  | C <sub>4</sub>  | C <sub>19</sub> | 119.99 (12) | O <sub>2</sub>  | C <sub>19</sub> | C <sub>20</sub> | 122.23 (12) |
| C <sub>5</sub>  | C <sub>4</sub>  | C <sub>19</sub> | 121.97 (11) | C <sub>21</sub> | C <sub>20</sub> | C <sub>19</sub> | 118.86 (12) |
| C <sub>4</sub>  | C <sub>5</sub>  | C <sub>26</sub> | 121.78 (11) | C <sub>25</sub> | C <sub>20</sub> | C <sub>19</sub> | 121.94 (12) |
| N <sub>1</sub>  | C <sub>5</sub>  | C <sub>4</sub>  | 122.53 (11) | C <sub>25</sub> | C <sub>20</sub> | C <sub>21</sub> | 119.18 (13) |
| N <sub>1</sub>  | C <sub>5</sub>  | C <sub>26</sub> | 115.65 (11) | C <sub>22</sub> | C <sub>21</sub> | C <sub>20</sub> | 120.50 (15) |
| C <sub>7</sub>  | C <sub>6</sub>  | C <sub>1</sub>  | 120.35 (11) | C <sub>23</sub> | C <sub>22</sub> | C <sub>21</sub> | 120.06 (15) |
| C <sub>7</sub>  | C <sub>6</sub>  | C <sub>11</sub> | 118.52 (12) | C <sub>22</sub> | C <sub>23</sub> | C <sub>24</sub> | 120.05 (15) |
| C <sub>11</sub> | C <sub>6</sub>  | C <sub>1</sub>  | 121.10 (11) | C <sub>23</sub> | C <sub>24</sub> | C <sub>25</sub> | 120.24 (15) |
| C <sub>8</sub>  | C <sub>7</sub>  | C <sub>6</sub>  | 120.98 (13) | C <sub>24</sub> | C <sub>25</sub> | C <sub>20</sub> | 119.90 (14) |
| C <sub>9</sub>  | C <sub>8</sub>  | C <sub>7</sub>  | 119.95 (14) | C <sub>27</sub> | C <sub>26</sub> | C <sub>5</sub>  | 121.05 (11) |
| C <sub>10</sub> | C <sub>9</sub>  | C <sub>8</sub>  | 119.75 (13) | C <sub>31</sub> | C <sub>26</sub> | C <sub>5</sub>  | 120.32 (12) |
| C <sub>9</sub>  | C <sub>10</sub> | C <sub>11</sub> | 120.52 (13) | C <sub>31</sub> | C <sub>26</sub> | C <sub>27</sub> | 118.59 (13) |
| C <sub>10</sub> | C <sub>11</sub> | C <sub>6</sub>  | 120.27 (13) | C <sub>26</sub> | C <sub>27</sub> | C <sub>28</sub> | 120.57 (14) |
| C <sub>13</sub> | C <sub>12</sub> | C <sub>2</sub>  | 120.06 (11) | C <sub>29</sub> | C <sub>28</sub> | C <sub>27</sub> | 120.20 (15) |
| O <sub>1</sub>  | C <sub>12</sub> | C <sub>2</sub>  | 118.01 (12) | C <sub>28</sub> | C <sub>29</sub> | C <sub>30</sub> | 119.59 (14) |
| O <sub>1</sub>  | C <sub>12</sub> | C <sub>13</sub> | 121.88 (12) | C <sub>29</sub> | C <sub>30</sub> | C <sub>31</sub> | 120.51 (15) |
| C <sub>14</sub> | C <sub>13</sub> | C <sub>12</sub> | 118.41 (13) | C <sub>26</sub> | C <sub>31</sub> | C <sub>30</sub> | 120.49 (15) |
| C <sub>18</sub> | C <sub>13</sub> | C <sub>12</sub> | 122.25 (11) | C <sub>5</sub>  | N <sub>1</sub>  | C <sub>1</sub>  | 119.26 (11) |

**Table 6 Torsion Angles for 201209170.**

| A              | B               | C               | D               | Angle/       | A               | B               | C               | D               | Angle/      |
|----------------|-----------------|-----------------|-----------------|--------------|-----------------|-----------------|-----------------|-----------------|-------------|
| C <sub>1</sub> | C <sub>2</sub>  | C <sub>3</sub>  | C <sub>4</sub>  | -3.29 (19)   | C <sub>12</sub> | C <sub>2</sub>  | C <sub>3</sub>  | C <sub>4</sub>  | 167.23 (12) |
| C <sub>1</sub> | C <sub>2</sub>  | C <sub>12</sub> | C <sub>13</sub> | -123.18 (13) | C <sub>12</sub> | C <sub>13</sub> | C <sub>14</sub> | C <sub>15</sub> | 179.46 (14) |
| C <sub>1</sub> | C <sub>2</sub>  | C <sub>12</sub> | O <sub>1</sub>  | 59.30 (17)   | C <sub>12</sub> | C <sub>13</sub> | C <sub>18</sub> | C <sub>17</sub> | 179.88 (12) |
| C <sub>1</sub> | C <sub>6</sub>  | C <sub>7</sub>  | C <sub>8</sub>  | -179.36 (12) | C <sub>13</sub> | C <sub>14</sub> | C <sub>15</sub> | C <sub>16</sub> | 0.7 (3)     |
| C <sub>1</sub> | C <sub>6</sub>  | C <sub>11</sub> | C <sub>10</sub> | 179.13 (12)  | C <sub>14</sub> | C <sub>13</sub> | C <sub>18</sub> | C <sub>17</sub> | -0.32 (19)  |
| C <sub>2</sub> | C <sub>1</sub>  | C <sub>6</sub>  | C <sub>7</sub>  | -140.44 (13) | C <sub>14</sub> | C <sub>15</sub> | C <sub>16</sub> | C <sub>17</sub> | -0.4 (3)    |
| C <sub>2</sub> | C <sub>1</sub>  | C <sub>6</sub>  | C <sub>11</sub> | 41.54 (17)   | C <sub>15</sub> | C <sub>16</sub> | C <sub>17</sub> | C <sub>18</sub> | -0.3 (3)    |
| C <sub>2</sub> | C <sub>1</sub>  | N <sub>1</sub>  | C <sub>5</sub>  | -0.36 (17)   | C <sub>16</sub> | C <sub>17</sub> | C <sub>18</sub> | C <sub>13</sub> | 0.6 (2)     |
| C <sub>2</sub> | C <sub>3</sub>  | C <sub>4</sub>  | C <sub>5</sub>  | 1.51 (19)    | C <sub>18</sub> | C <sub>13</sub> | C <sub>14</sub> | C <sub>15</sub> | -0.3 (2)    |
| C <sub>2</sub> | C <sub>3</sub>  | C <sub>4</sub>  | C <sub>19</sub> | -176.19 (12) | C <sub>19</sub> | C <sub>4</sub>  | C <sub>5</sub>  | C <sub>26</sub> | -3.62 (18)  |
| C <sub>2</sub> | C <sub>12</sub> | C <sub>13</sub> | C <sub>14</sub> | -169.36 (12) | C <sub>19</sub> | C <sub>4</sub>  | C <sub>5</sub>  | N <sub>1</sub>  | 178.63 (11) |

|                                                                |              |                                                                 |              |
|----------------------------------------------------------------|--------------|-----------------------------------------------------------------|--------------|
| C <sub>2</sub> C <sub>12</sub> C <sub>13</sub> C <sub>18</sub> | 10.44 (18)   | C <sub>19</sub> C <sub>20</sub> C <sub>21</sub> C <sub>22</sub> | -179.93 (14) |
| C <sub>3</sub> C <sub>2</sub> C <sub>12</sub> C <sub>13</sub>  | 66.69 (16)   | C <sub>19</sub> C <sub>20</sub> C <sub>25</sub> C <sub>24</sub> | -177.55 (15) |
| C <sub>3</sub> C <sub>2</sub> C <sub>12</sub> O <sub>1</sub>   | -110.82 (15) | C <sub>20</sub> C <sub>21</sub> C <sub>22</sub> C <sub>23</sub> | -2.5 (3)     |
| C <sub>3</sub> C <sub>4</sub> C <sub>5</sub> C <sub>26</sub>   | 178.74 (12)  | C <sub>21</sub> C <sub>20</sub> C <sub>25</sub> C <sub>24</sub> | 1.1 (2)      |
| C <sub>3</sub> C <sub>4</sub> C <sub>5</sub> N <sub>1</sub>    | 0.99 (18)    | C <sub>21</sub> C <sub>22</sub> C <sub>23</sub> C <sub>24</sub> | 1.1 (3)      |
| C <sub>3</sub> C <sub>4</sub> C <sub>19</sub> C <sub>20</sub>  | 104.03 (15)  | C <sub>22</sub> C <sub>23</sub> C <sub>24</sub> C <sub>25</sub> | 1.4 (3)      |
| C <sub>3</sub> C <sub>4</sub> C <sub>19</sub> O <sub>2</sub>   | -75.31 (19)  | C <sub>23</sub> C <sub>24</sub> C <sub>25</sub> C <sub>20</sub> | -2.5 (3)     |
| C <sub>4</sub> C <sub>5</sub> C <sub>26</sub> C <sub>27</sub>  | -59.66 (18)  | C <sub>25</sub> C <sub>20</sub> C <sub>21</sub> C <sub>22</sub> | 1.3 (2)      |
| C <sub>4</sub> C <sub>5</sub> C <sub>26</sub> C <sub>31</sub>  | 122.88 (15)  | C <sub>26</sub> C <sub>5</sub> N <sub>1</sub> C <sub>1</sub>    | -179.44 (11) |
| C <sub>4</sub> C <sub>5</sub> N <sub>1</sub> C <sub>1</sub>    | -1.57 (18)   | C <sub>26</sub> C <sub>27</sub> C <sub>28</sub> C <sub>29</sub> | -2.3 (3)     |
| C <sub>4</sub> C <sub>19</sub> C <sub>20</sub> C <sub>21</sub> | 158.38 (13)  | C <sub>27</sub> C <sub>26</sub> C <sub>31</sub> C <sub>30</sub> | 0.0 (3)      |
| C <sub>4</sub> C <sub>19</sub> C <sub>20</sub> C <sub>25</sub> | -22.92 (19)  | C <sub>27</sub> C <sub>28</sub> C <sub>29</sub> C <sub>30</sub> | 1.2 (3)      |
| C <sub>5</sub> C <sub>4</sub> C <sub>19</sub> C <sub>20</sub>  | -73.56 (16)  | C <sub>28</sub> C <sub>29</sub> C <sub>30</sub> C <sub>31</sub> | 0.6 (3)      |
| C <sub>5</sub> C <sub>4</sub> C <sub>19</sub> O <sub>2</sub>   | 107.09 (17)  | C <sub>29</sub> C <sub>30</sub> C <sub>31</sub> C <sub>26</sub> | -1.2 (3)     |
| C <sub>5</sub> C <sub>26</sub> C <sub>27</sub> C <sub>28</sub> | -175.79 (15) | C <sub>31</sub> C <sub>26</sub> C <sub>27</sub> C <sub>28</sub> | 1.7 (2)      |
| C <sub>5</sub> C <sub>26</sub> C <sub>31</sub> C <sub>30</sub> | 177.55 (16)  | N <sub>1</sub> C <sub>1</sub> C <sub>2</sub> C <sub>3</sub>     | 2.77 (18)    |
| C <sub>6</sub> C <sub>1</sub> C <sub>2</sub> C <sub>3</sub>    | -175.14 (11) | N <sub>1</sub> C <sub>1</sub> C <sub>2</sub> C <sub>12</sub>    | -167.39 (11) |
| C <sub>6</sub> C <sub>1</sub> C <sub>2</sub> C <sub>12</sub>   | 14.70 (18)   | N <sub>1</sub> C <sub>1</sub> C <sub>6</sub> C <sub>7</sub>     | 41.53 (16)   |
| C <sub>6</sub> C <sub>1</sub> N <sub>1</sub> C <sub>5</sub>    | 177.68 (10)  | N <sub>1</sub> C <sub>1</sub> C <sub>6</sub> C <sub>11</sub>    | -136.48 (12) |
| C <sub>6</sub> C <sub>7</sub> C <sub>8</sub> C <sub>9</sub>    | 0.4 (2)      | N <sub>1</sub> C <sub>5</sub> C <sub>26</sub> C <sub>27</sub>   | 118.24 (14)  |
| C <sub>7</sub> C <sub>6</sub> C <sub>11</sub> C <sub>10</sub>  | 1.08 (19)    | N <sub>1</sub> C <sub>5</sub> C <sub>26</sub> C <sub>31</sub>   | -59.22 (17)  |
| C <sub>7</sub> C <sub>8</sub> C <sub>9</sub> C <sub>10</sub>   | 0.8 (2)      | O <sub>1</sub> C <sub>12</sub> C <sub>13</sub> C <sub>14</sub>  | 8.06 (19)    |
| C <sub>8</sub> C <sub>9</sub> C <sub>10</sub> C <sub>11</sub>  | -1.0 (2)     | O <sub>1</sub> C <sub>12</sub> C <sub>13</sub> C <sub>18</sub>  | -172.15 (13) |
| C <sub>9</sub> C <sub>10</sub> C <sub>11</sub> C <sub>6</sub>  | 0.0 (2)      | O <sub>2</sub> C <sub>19</sub> C <sub>20</sub> C <sub>21</sub>  | -22.3 (2)    |
| C <sub>11</sub> C <sub>6</sub> C <sub>7</sub> C <sub>8</sub>   | -1.29 (19)   | O <sub>2</sub> C <sub>19</sub> C <sub>20</sub> C <sub>25</sub>  | 156.41 (16)  |

Table 7 Hydrogen Atom Coordinates ( $\text{\AA} \times 10^4$ ) and Isotropic Displacement Parameters ( $\text{\AA}^2 \times 10^3$ ) for 201209170.

| Atom            | <i>x</i> | <i>y</i> | <i>z</i> | U(eq) |
|-----------------|----------|----------|----------|-------|
| H <sub>3</sub>  | 4593     | 6373     | 9389     | 53    |
| H <sub>7</sub>  | -3404    | 6669     | 7436     | 56    |
| H <sub>8</sub>  | -6113    | 7421     | 7091     | 65    |
| H <sub>9</sub>  | -5471    | 8488     | 7368     | 67    |
| H <sub>10</sub> | -2088    | 8801     | 7968     | 63    |
| H <sub>11</sub> | 627      | 8053     | 8322     | 53    |
| H <sub>14</sub> | 1290     | 7886     | 10665    | 67    |
| H <sub>15</sub> | 3775     | 8622     | 11217    | 84    |
| H <sub>16</sub> | 6931     | 8887     | 10675    | 82    |

|                 |      |      |      |    |
|-----------------|------|------|------|----|
| H <sub>17</sub> | 7651 | 8412 | 9585 | 68 |
| H <sub>18</sub> | 5210 | 7657 | 9034 | 56 |
| H <sub>21</sub> | 7627 | 4272 | 8514 | 65 |
| H <sub>22</sub> | 6484 | 3257 | 8784 | 78 |
| H <sub>23</sub> | 3170 | 3108 | 9280 | 74 |
| H <sub>24</sub> | 934  | 3971 | 9472 | 80 |
| H <sub>25</sub> | 1940 | 4985 | 9123 | 69 |
| H <sub>27</sub> | 5880 | 5617 | 7008 | 67 |
| H <sub>28</sub> | 6069 | 4936 | 6016 | 79 |
| H <sub>29</sub> | 3100 | 4290 | 5626 | 81 |
| H <sub>30</sub> | -114 | 4350 | 6198 | 90 |
| H <sub>31</sub> | -388 | 5064 | 7149 | 73 |
